# Supplementary material for: Regioselective formation of the quinazoline moiety on the upper rim of calix[4]arene as a route to inherently chiral systems
Source: Royal Society of Chemistry journal article supplement (doi:10.1039/d0nj01035a), 2020-01-01
Supplement: d0nj01035a1.pdf [file d0nj01035a1.pdf]

## Supporting Information

Martin Tlustý,<sup>†</sup> Hana Dvořáková,<sup>‡</sup> Jan Čejka,<sup>§</sup> Michal Kohout<sup>†</sup> and Pavel Lhoták<sup>†\*</sup>

<sup>†</sup>Department of Organic Chemistry, University of Chemistry and Technology, Prague (UCTP), Technická 5, 166 28 Prague 6, Czech Republic

<sup>‡</sup>Laboratory of NMR Spectroscopy, UCTP, Technická 5, 166 28 Prague 6, Czech Republic.

<sup>§</sup>Solid State Department, UCTP, Technická 5, 166 28 Prague 6, Czech Republic

### Table of Contents

|                                                        |           |
|--------------------------------------------------------|-----------|
| <b>1. Spectral characterization of compounds .....</b> | <b>2</b>  |
| <b>2. Dynamic NMR measurements.....</b>                | <b>31</b> |
| <b>3. Chiral separation and ECD spectra.....</b>       | <b>33</b> |
| <b>4. Crystallographic data.....</b>                   | <b>34</b> |
| <b>5. Titration experiments.....</b>                   | <b>35</b> |
| <b>6. Theoretical calculations .....</b>               | <b>41</b> |

# 1. Spectral characterization of compounds

MT21-2-3-H.ESP

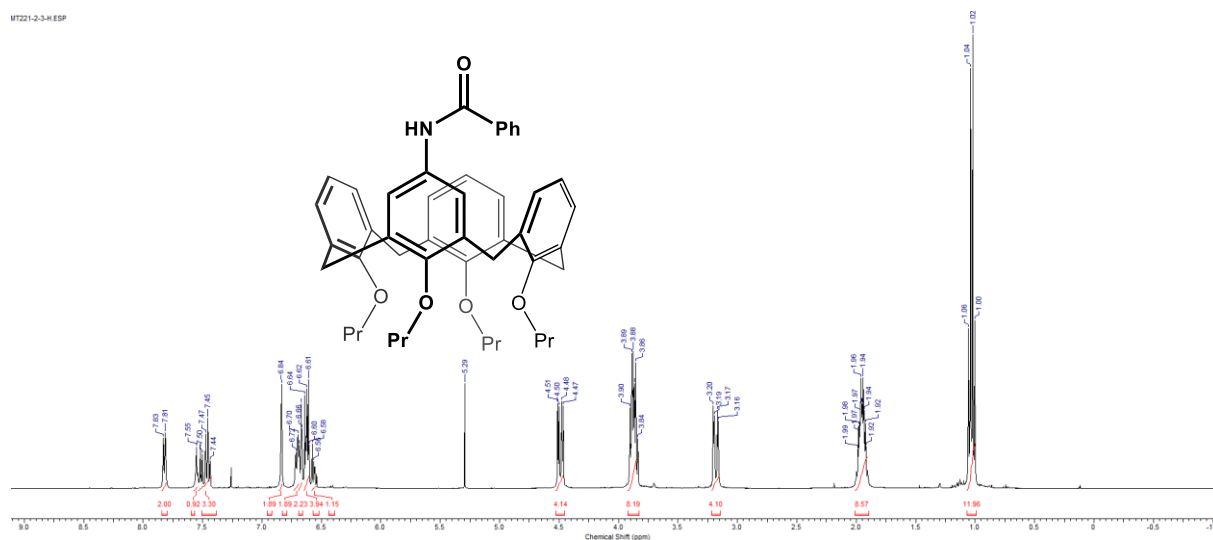

Figure 1: <sup>1</sup>H NMR of compound 5a (CDCl<sub>3</sub>, 400 MHz).

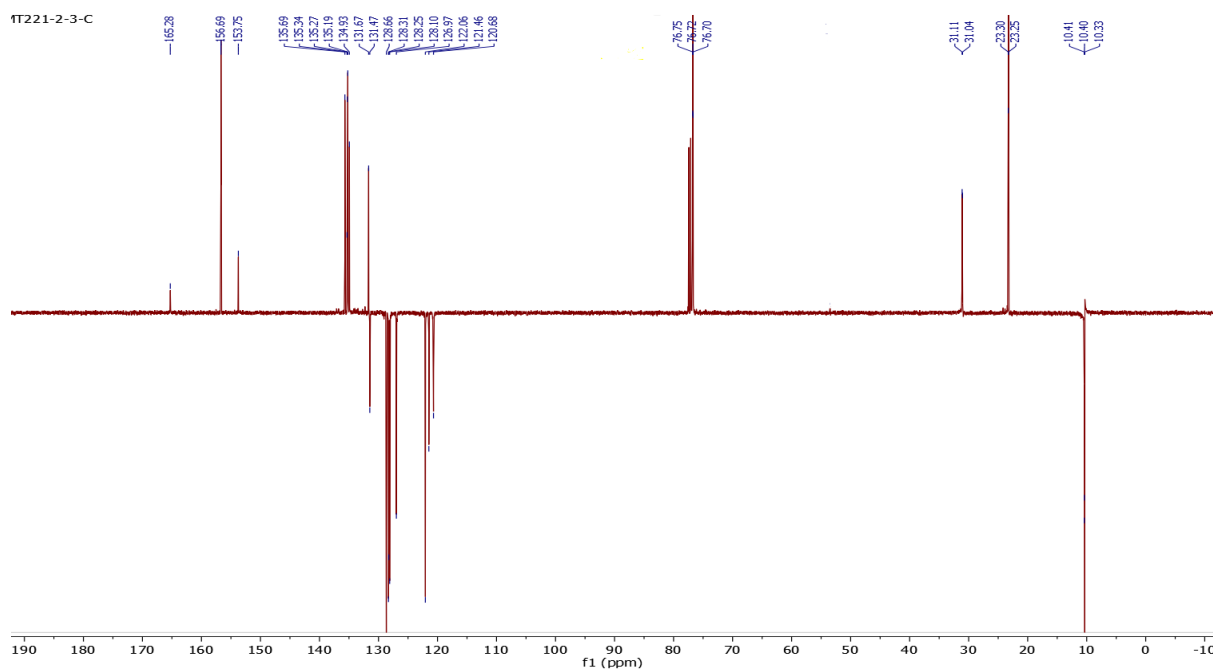

Figure 2: <sup>13</sup>C(APT) NMR of compound 5a (CDCl<sub>3</sub>, 100 MHz).

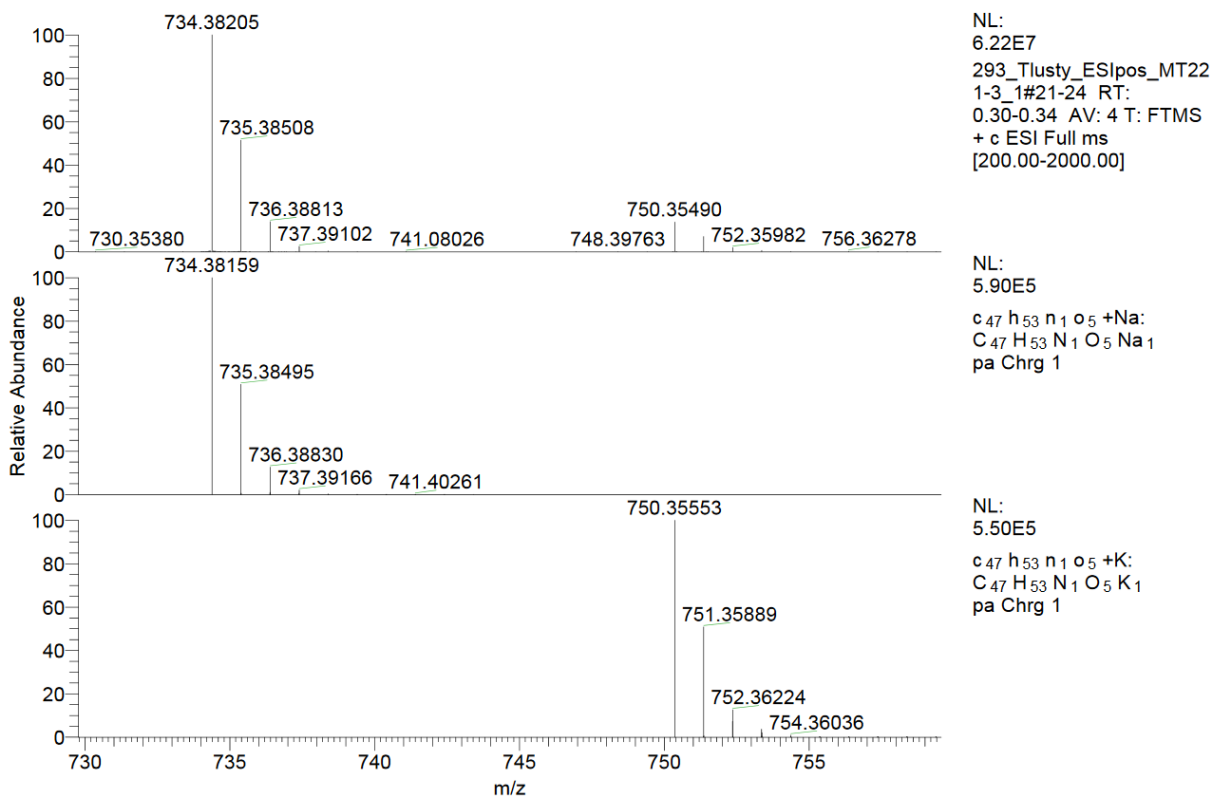

**Figure 3:** HRMS of compound **5a** (ESI<sup>+</sup>).

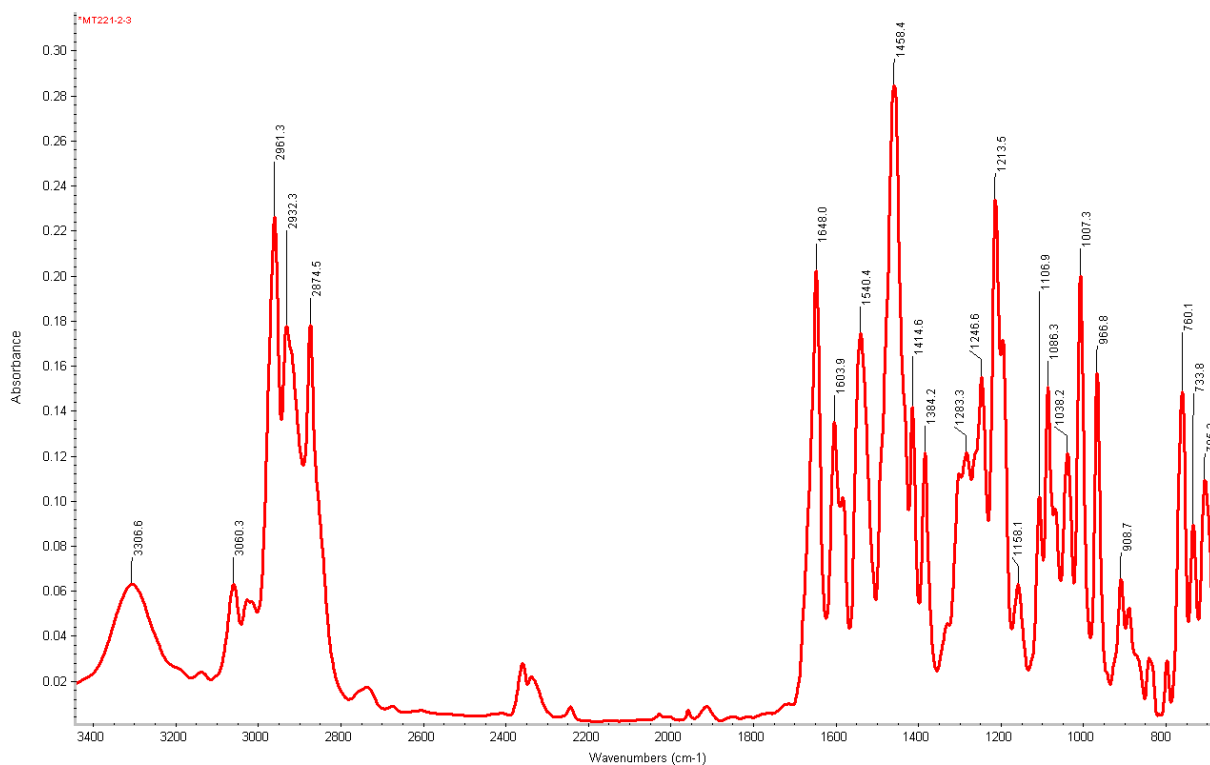

**Figure 4:** IR of compound **5a** (KBr).

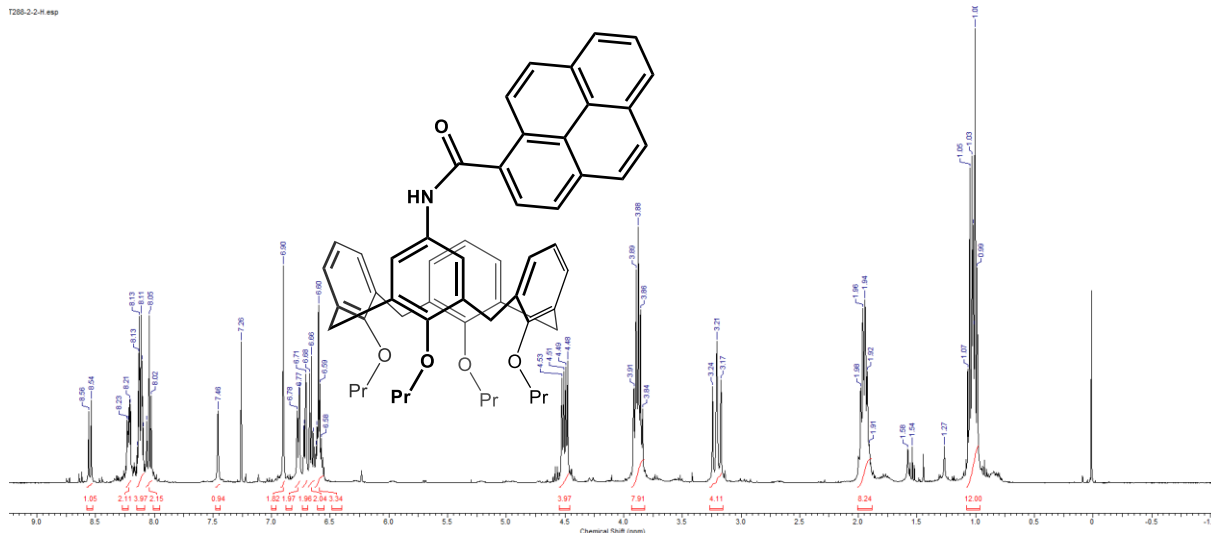

**Figure 5:**  $^1\text{H}$  NMR of compound **5b** ( $\text{CDCl}_3$ , 400 MHz).

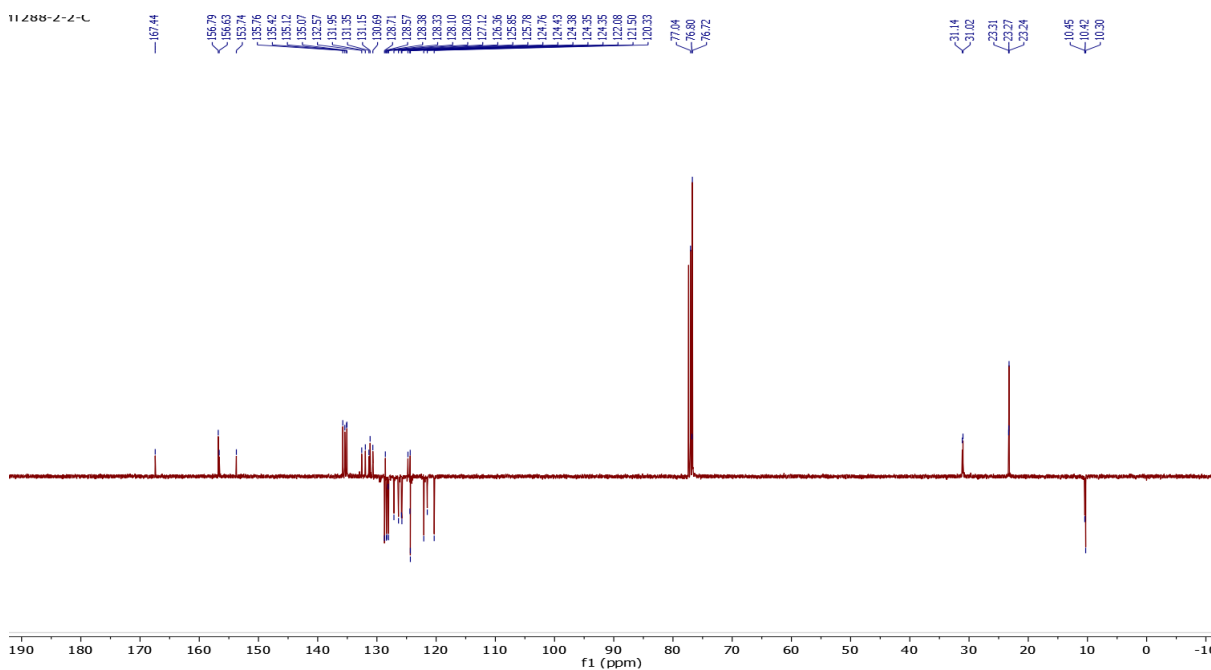

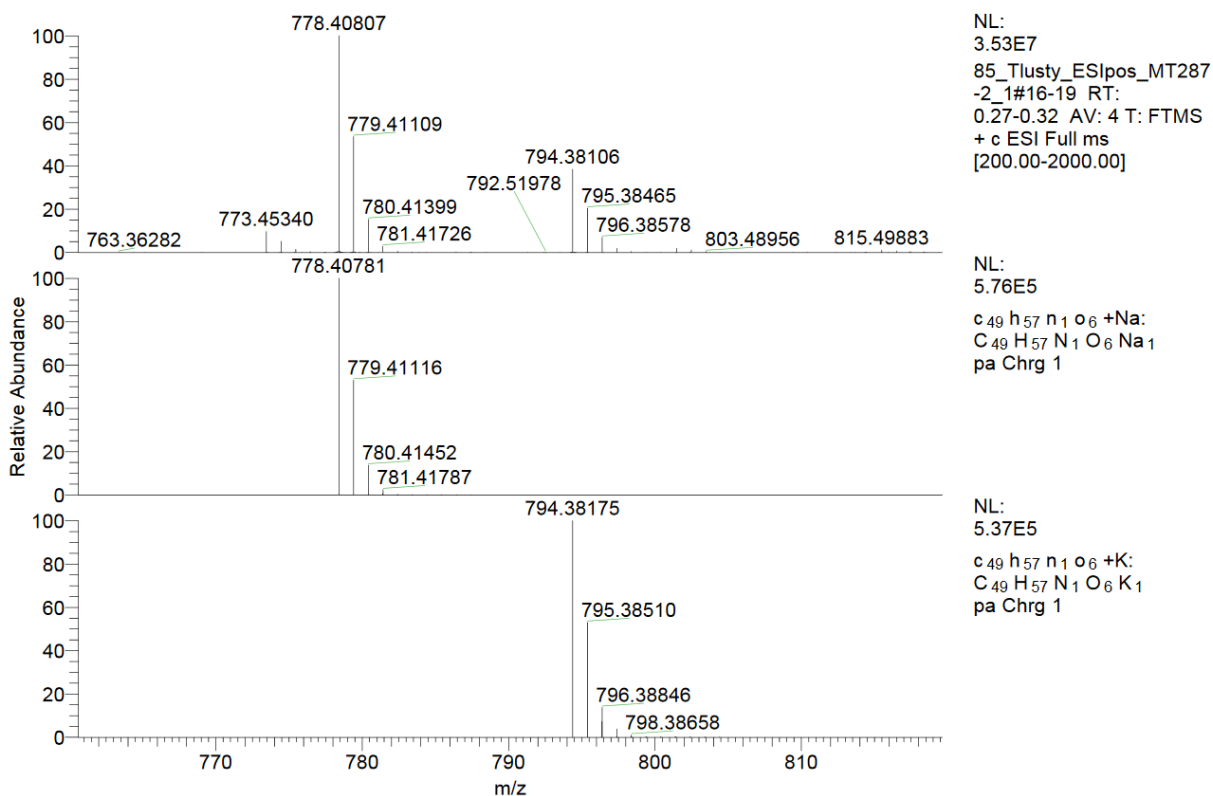

**Figure 7:** HRMS of compound **5b** (ESI<sup>+</sup>).

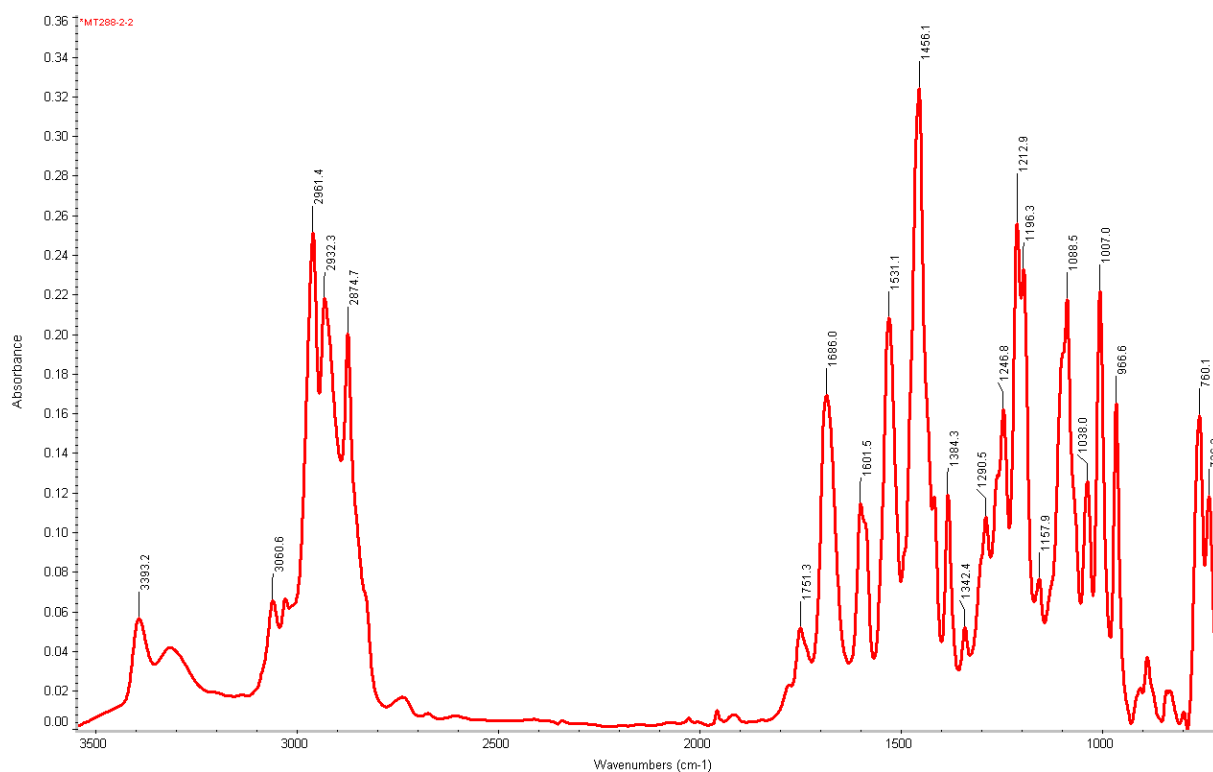

**Figure 8:** IR of compound **5b** (KBr).

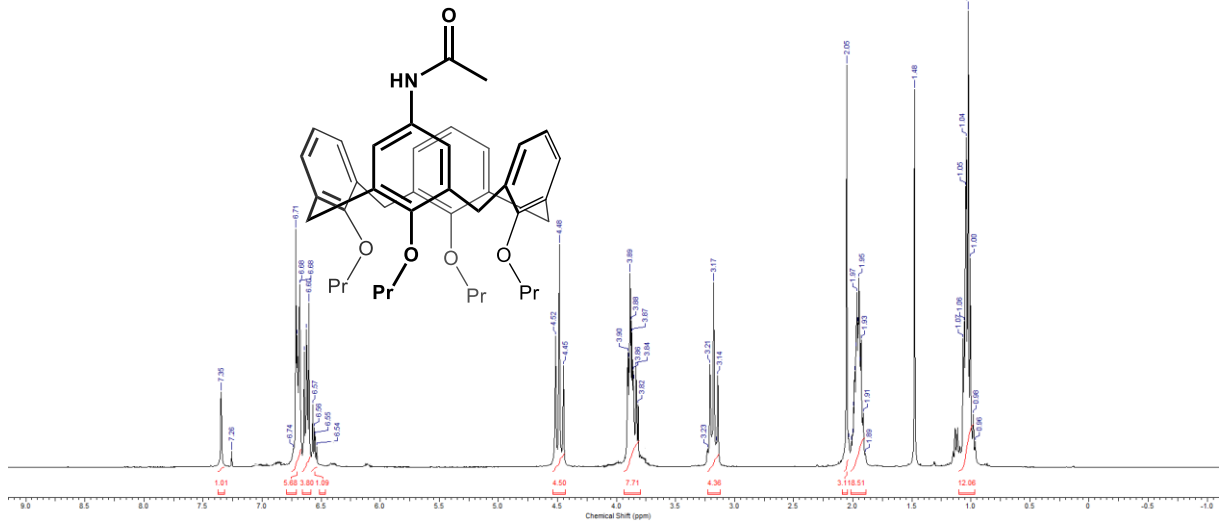

**Figure 9:**  $^1\text{H}$  NMR of compound 5c ( $\text{CDCl}_3$ , 400 MHz).

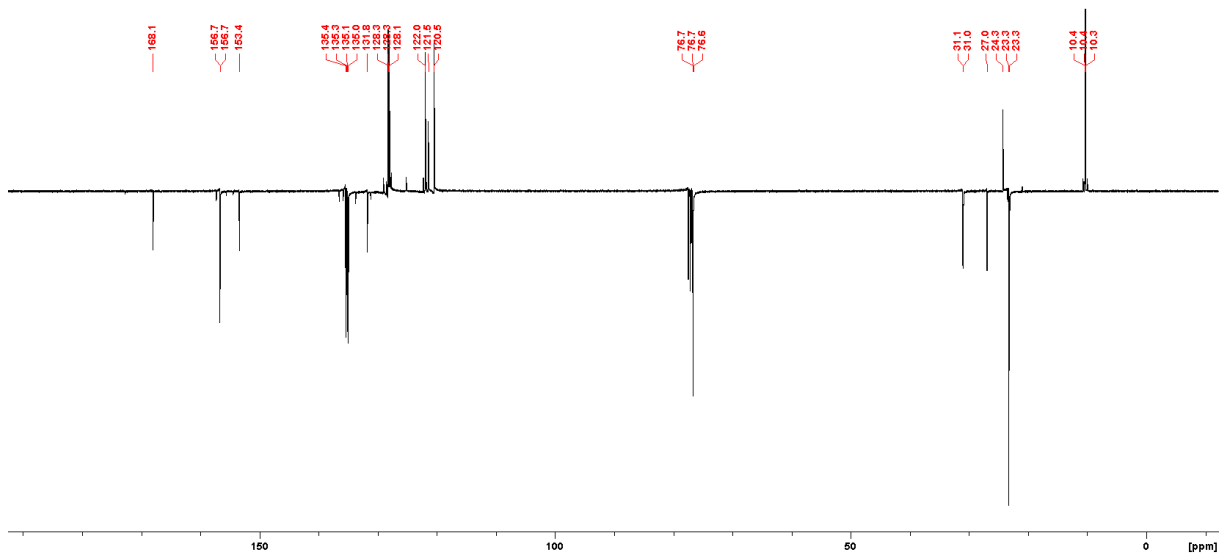

**Figure 10:**  $^{13}\text{C}$ (APT) NMR of compound 5c ( $\text{CDCl}_3$ , 100 MHz).

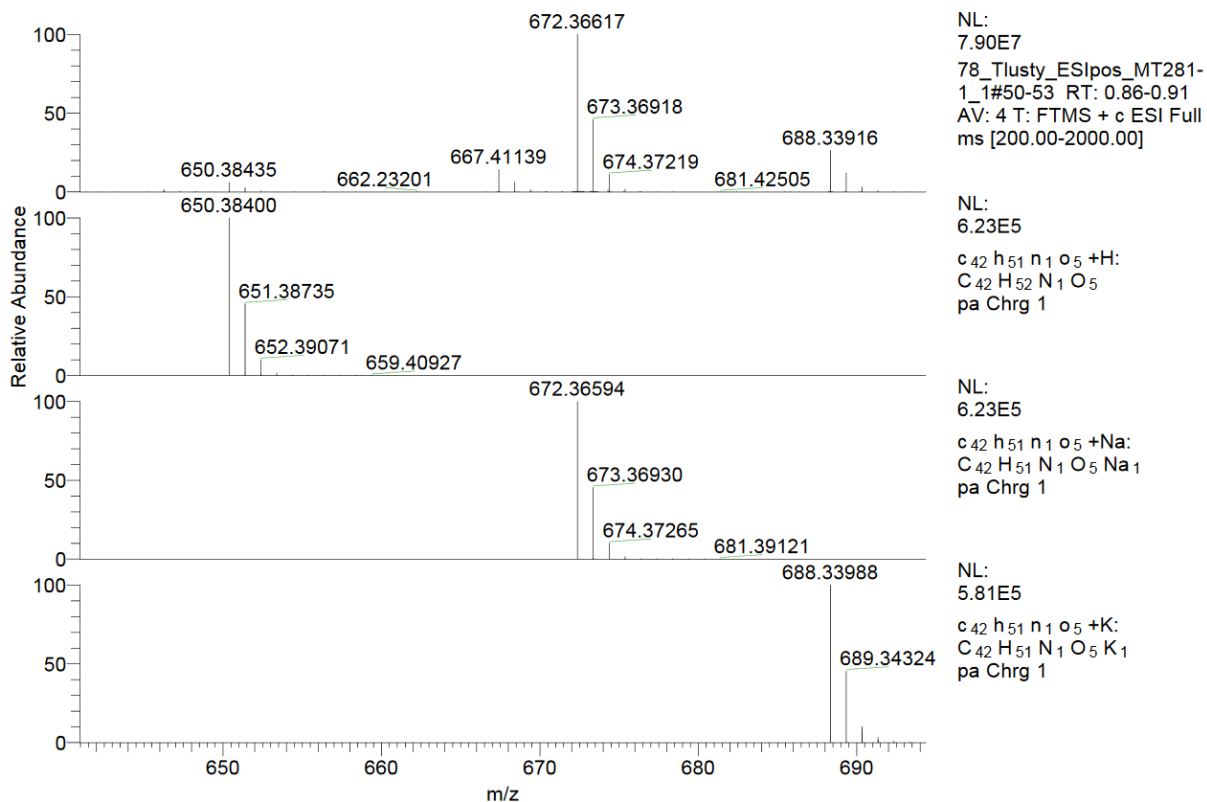

Figure 11: HRMS of compound 5c (ESI<sup>+</sup>).

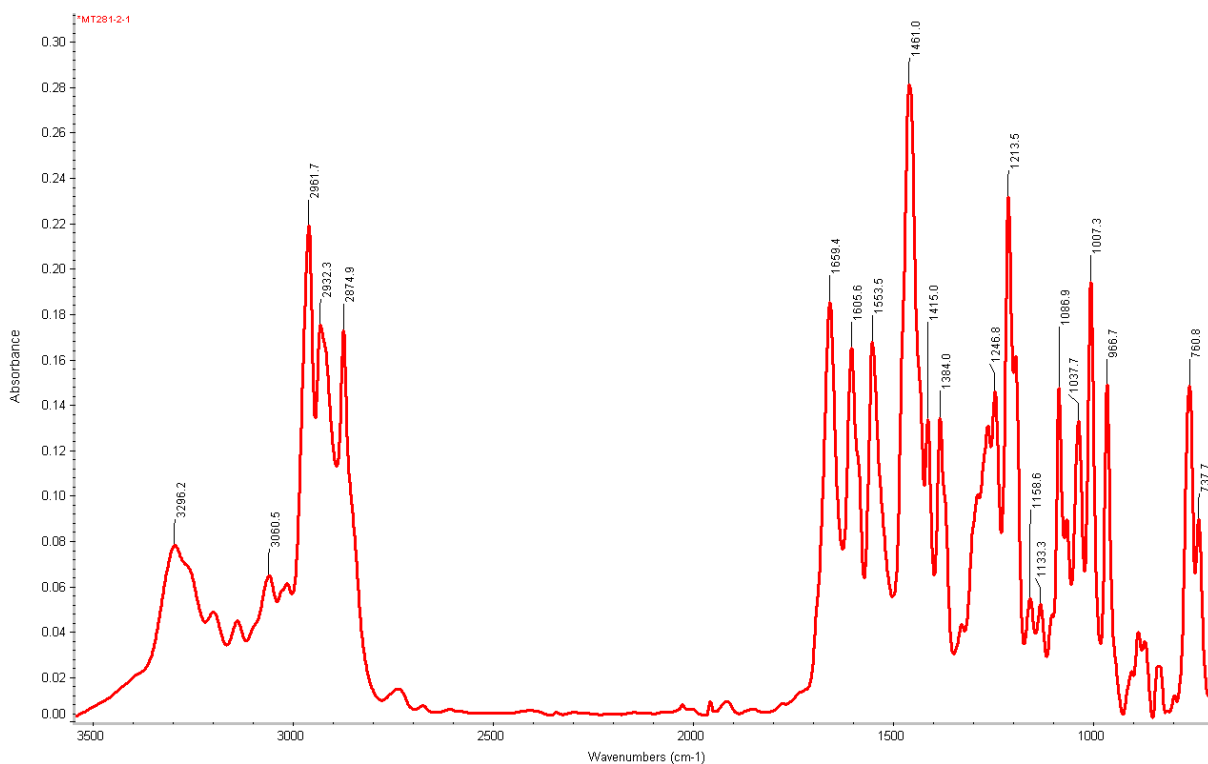

Figure 12: IR of compound 5c (KBr).

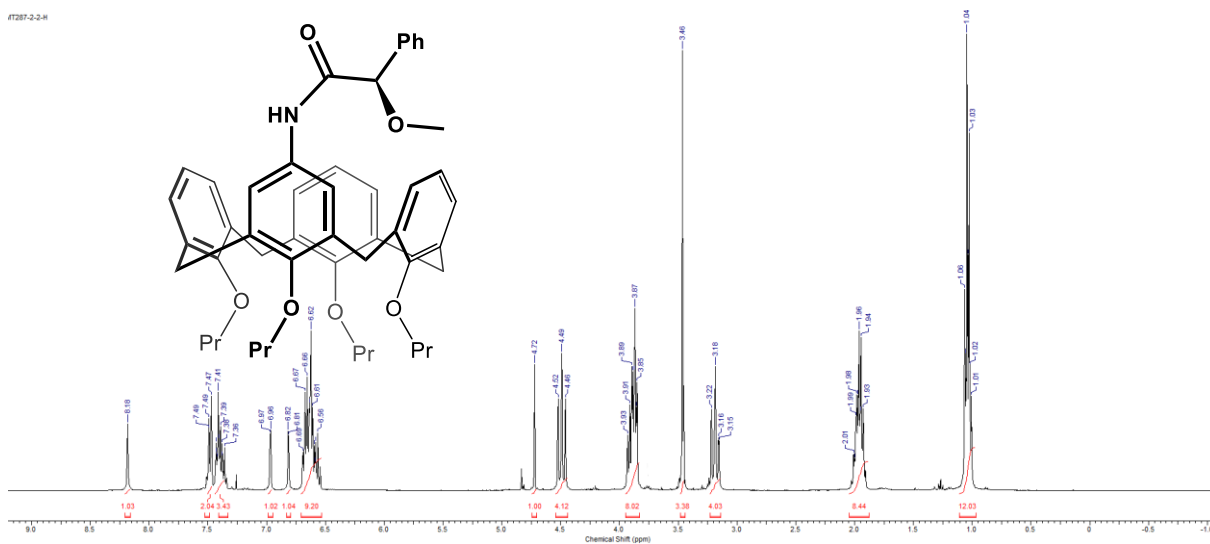

Figure 13:  $^1\text{H}$  NMR of compound 5d ( $\text{CDCl}_3$ , 400 MHz).

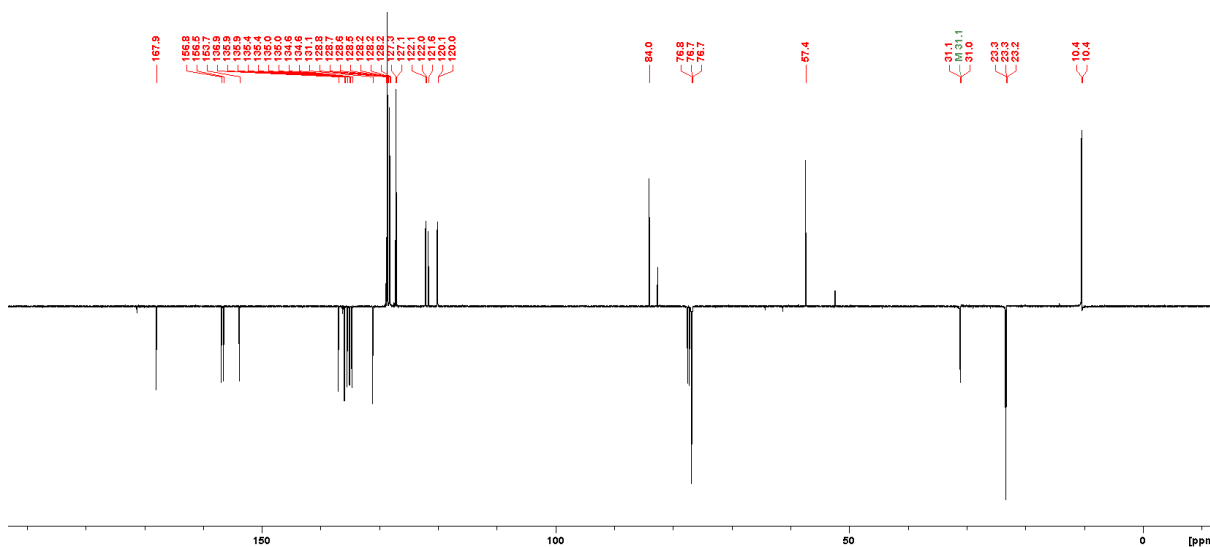

Figure 14:  $^{13}\text{C}$ (APT) NMR of compound 5d ( $\text{CDCl}_3$ , 100 MHz).



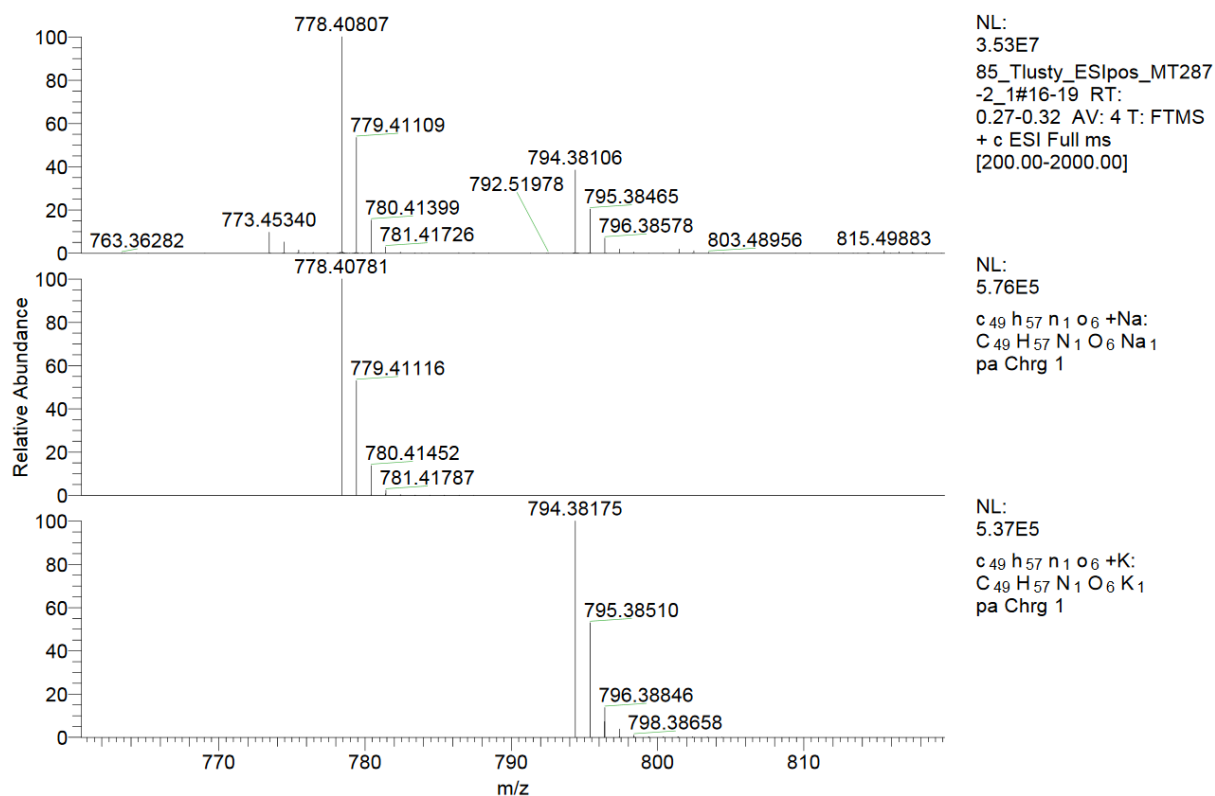

Figure 15: HRMS of compound **5d** (ESI<sup>+</sup>).

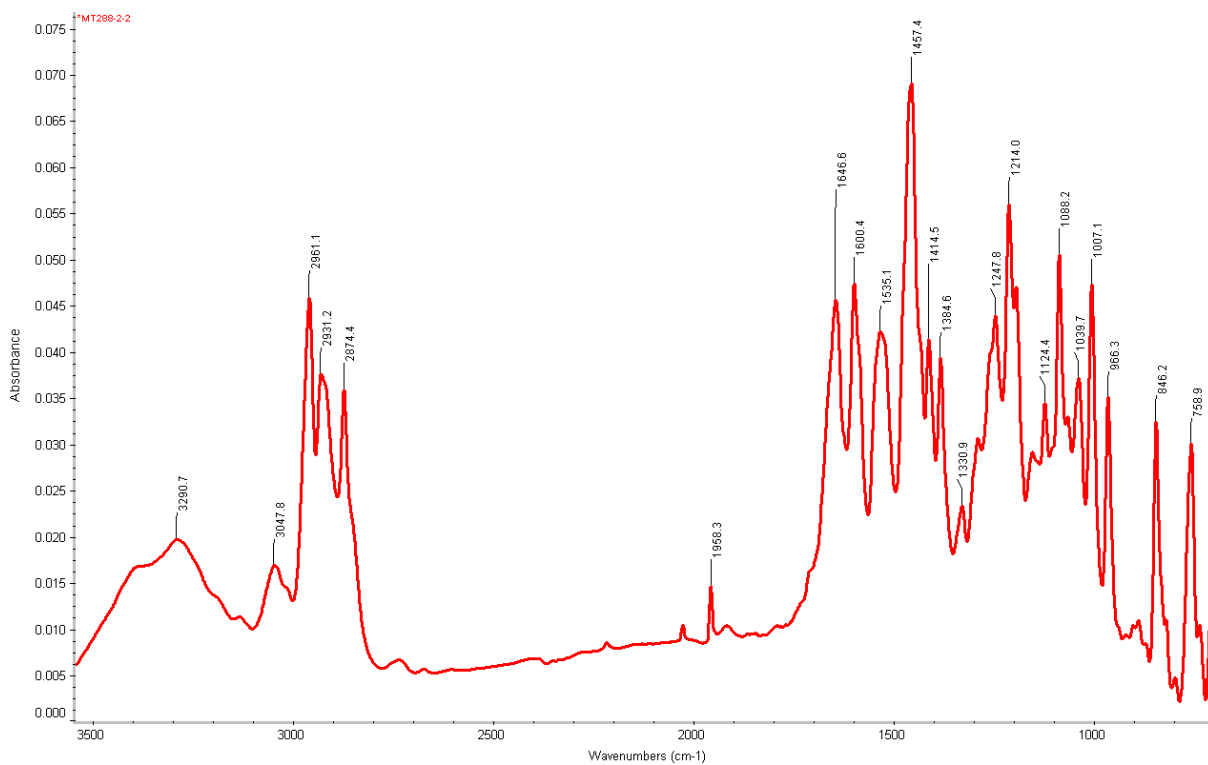

Figure 16: IR of compound **5d** (KBr).

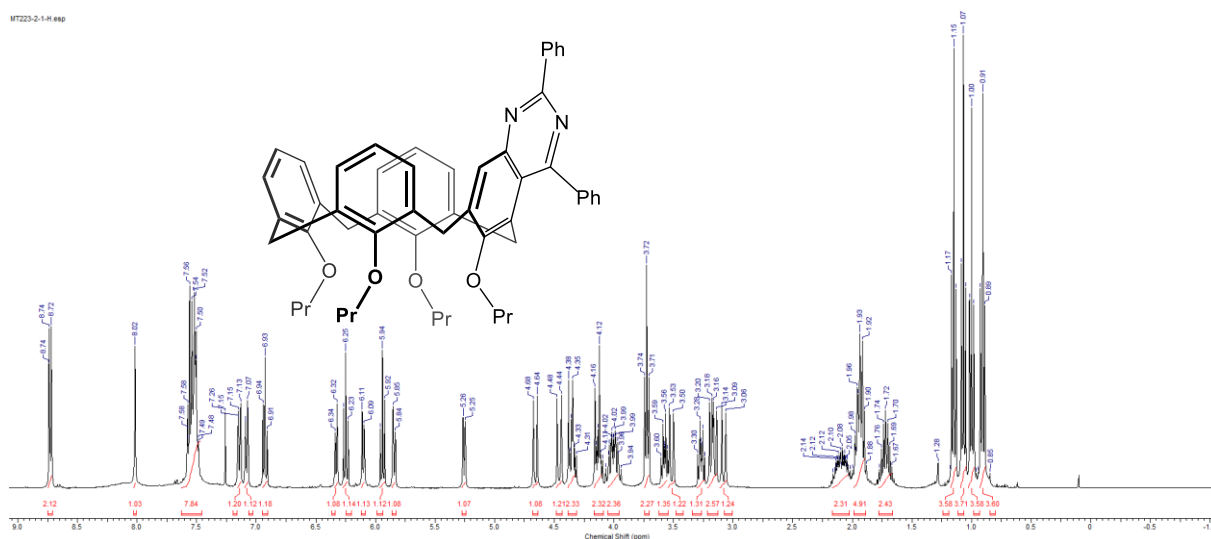

Figure 17:  $^1\text{H}$  NMR of compound **8aa** (CDCl<sub>3</sub>, 400 MHz).

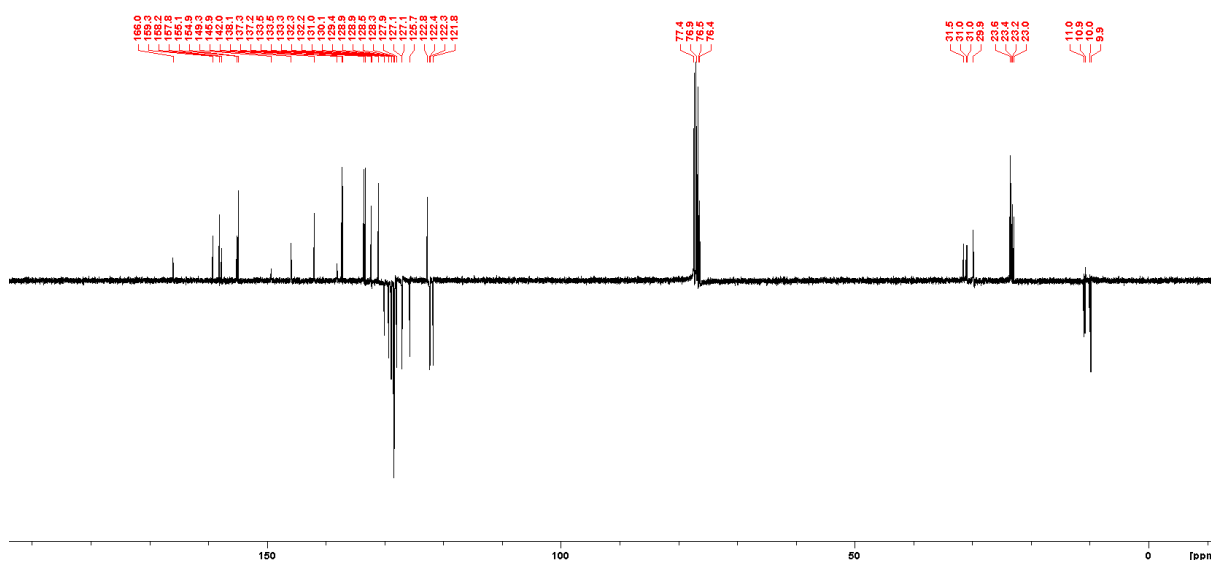

Figure 18:  $^{13}\text{C}$ (APT) NMR of compound **8aa** (CDCl<sub>3</sub>, 100 MHz).

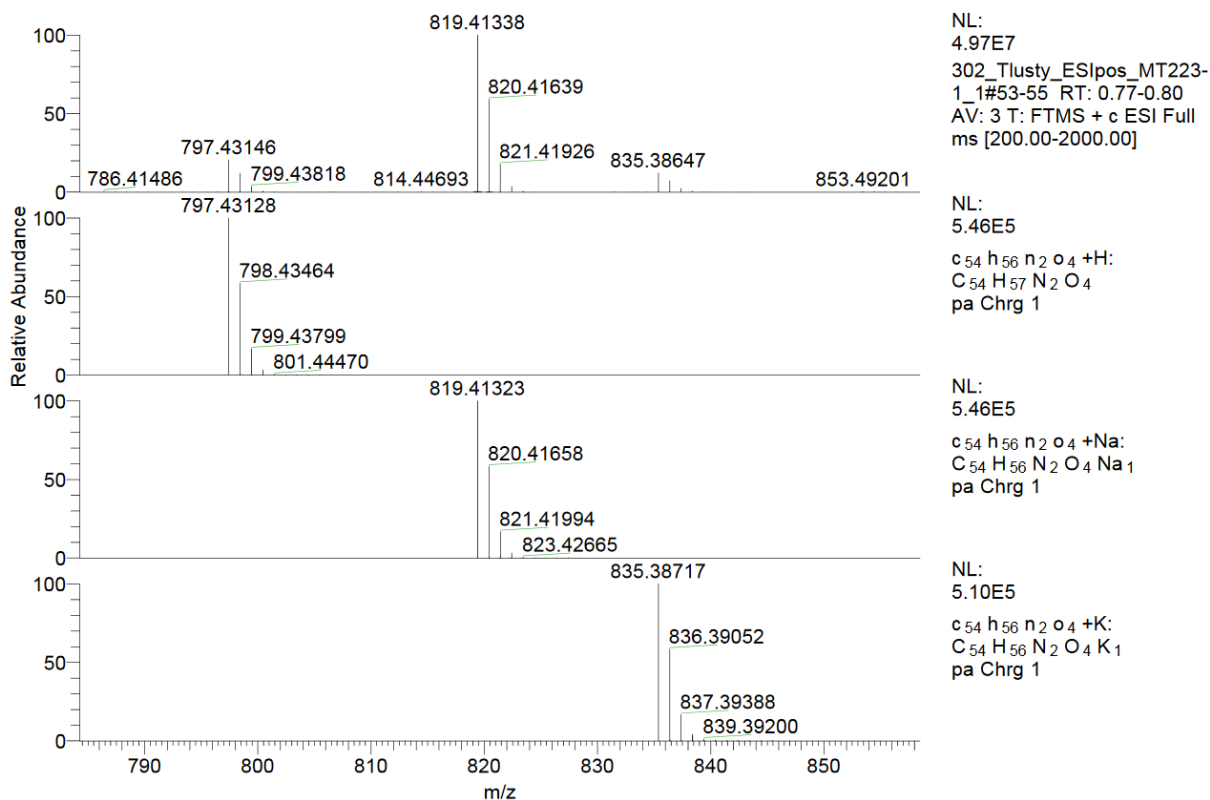

Figure 19: HRMS of compound **8aa** (ESI<sup>+</sup>).

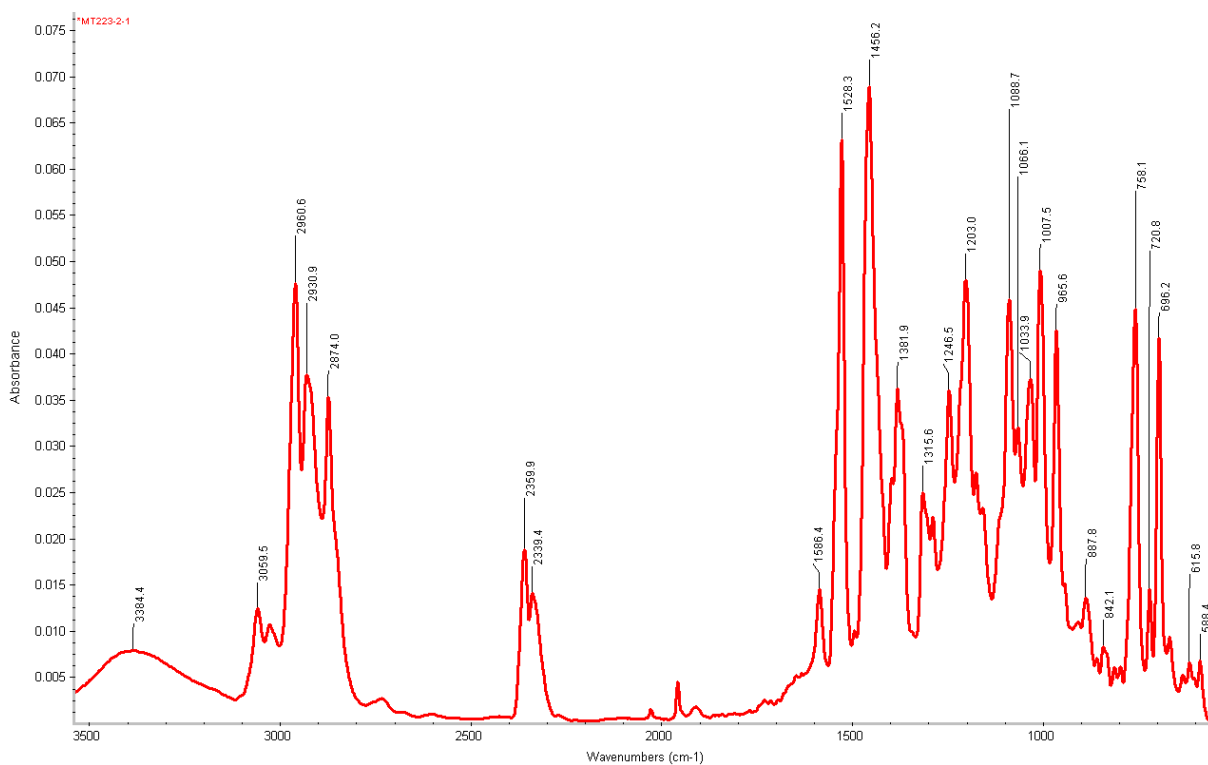

Figure 20: IR of compound **8aa** (KBr).

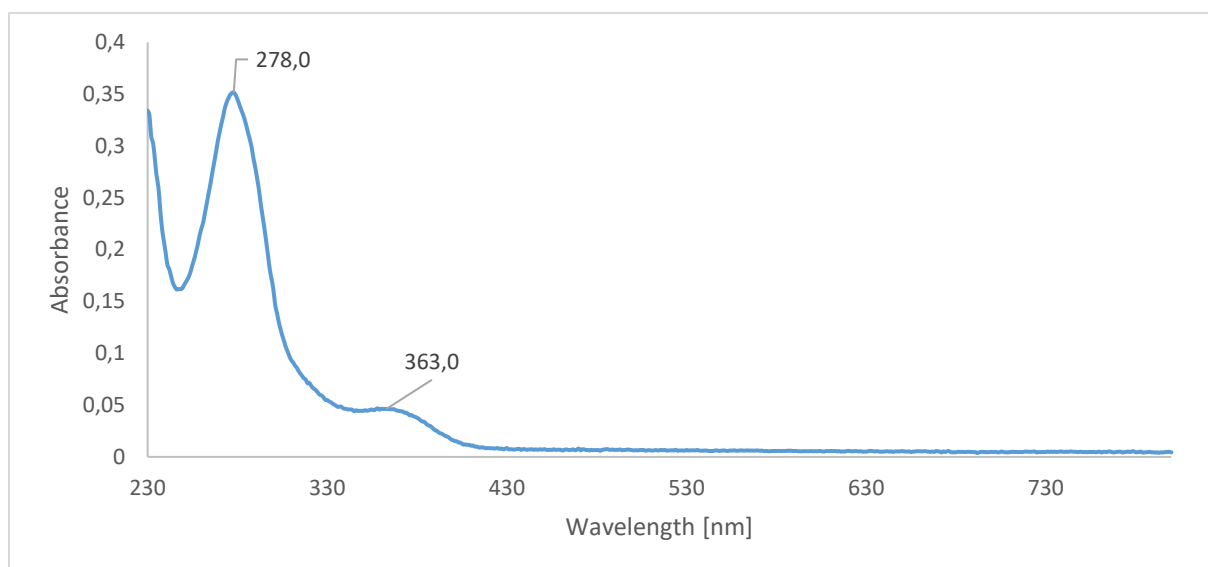

**Figure 21:** UV of compound **8aa** ( $\text{CH}_2\text{Cl}_2$ ).

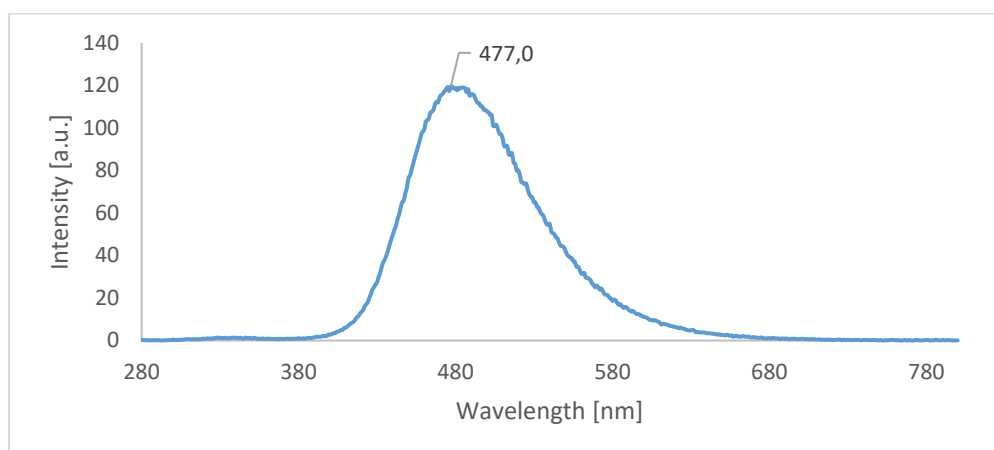

**Figure 22:** Fluorescence of compound **8aa** ( $\text{CH}_2\text{Cl}_2$ , excitation wavelength 278 nm).

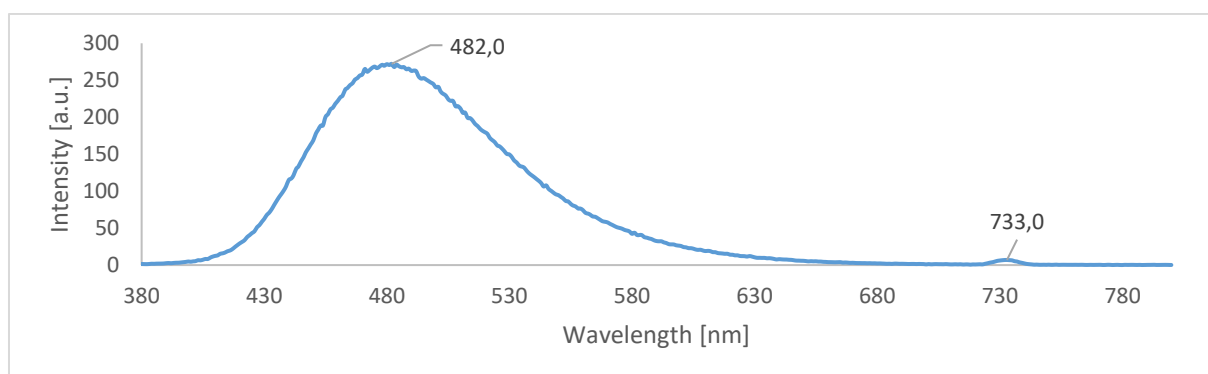

**Figure 23:** Fluorescence of compound **8aa** ( $\text{CH}_2\text{Cl}_2$ , excitation wavelength 367 nm).

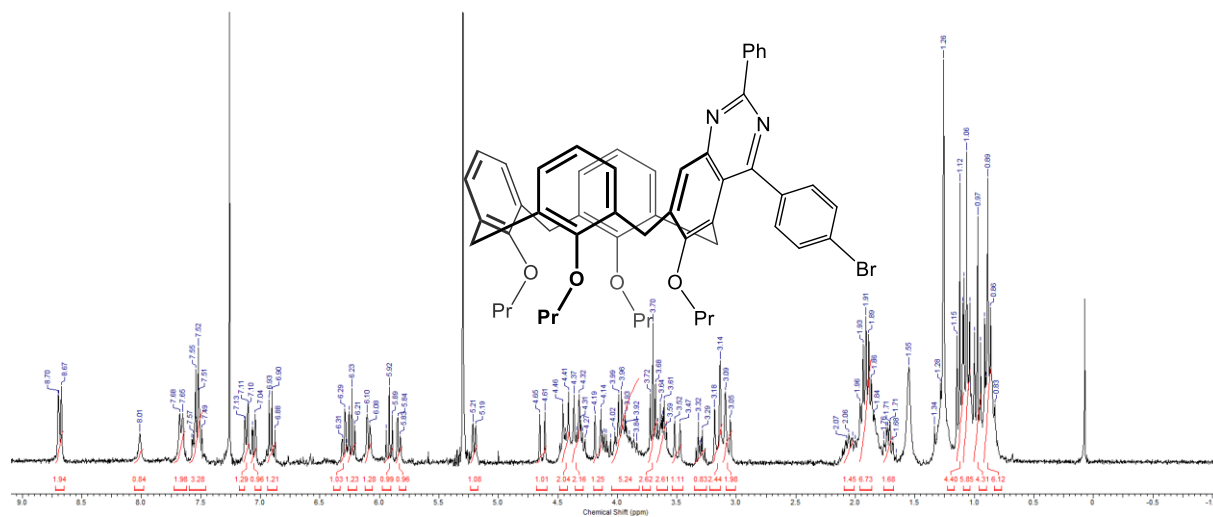

**Figure 24:**  $^1\text{H}$  NMR of compound **8ab** ( $\text{CDCl}_3$ , 400 MHz).

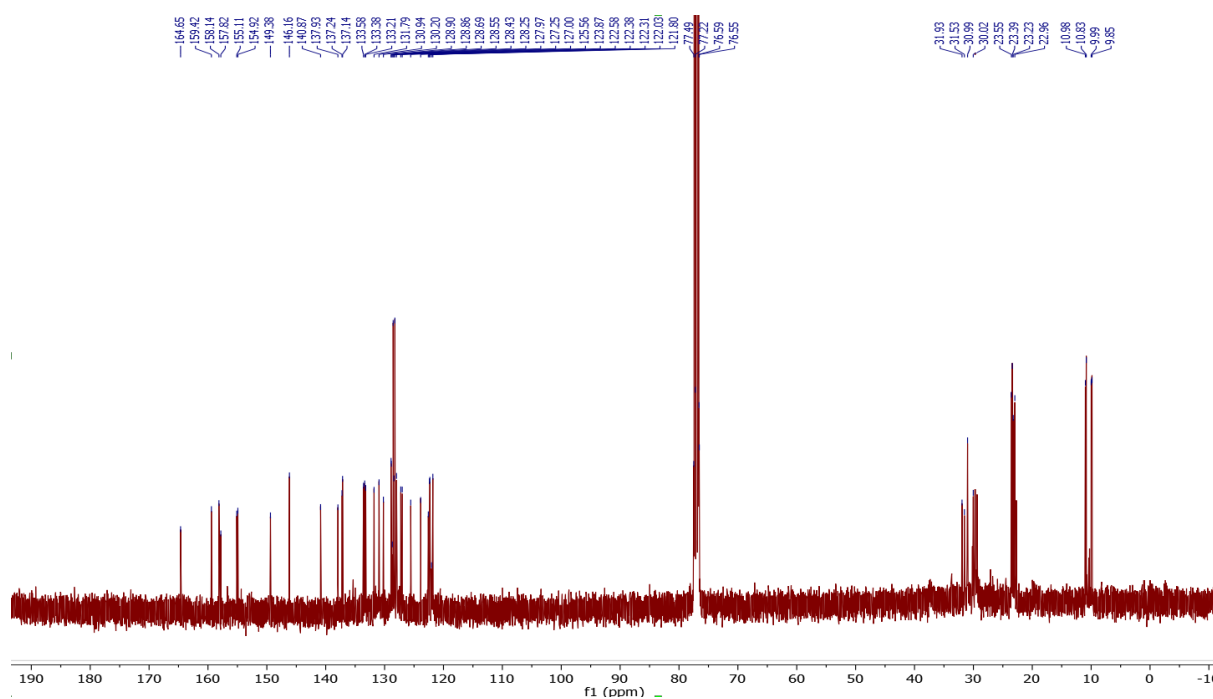

**Figure 25:**  $^{13}\text{C}$  NMR of compound **8ab** ( $\text{CDCl}_3$ , 100 MHz).

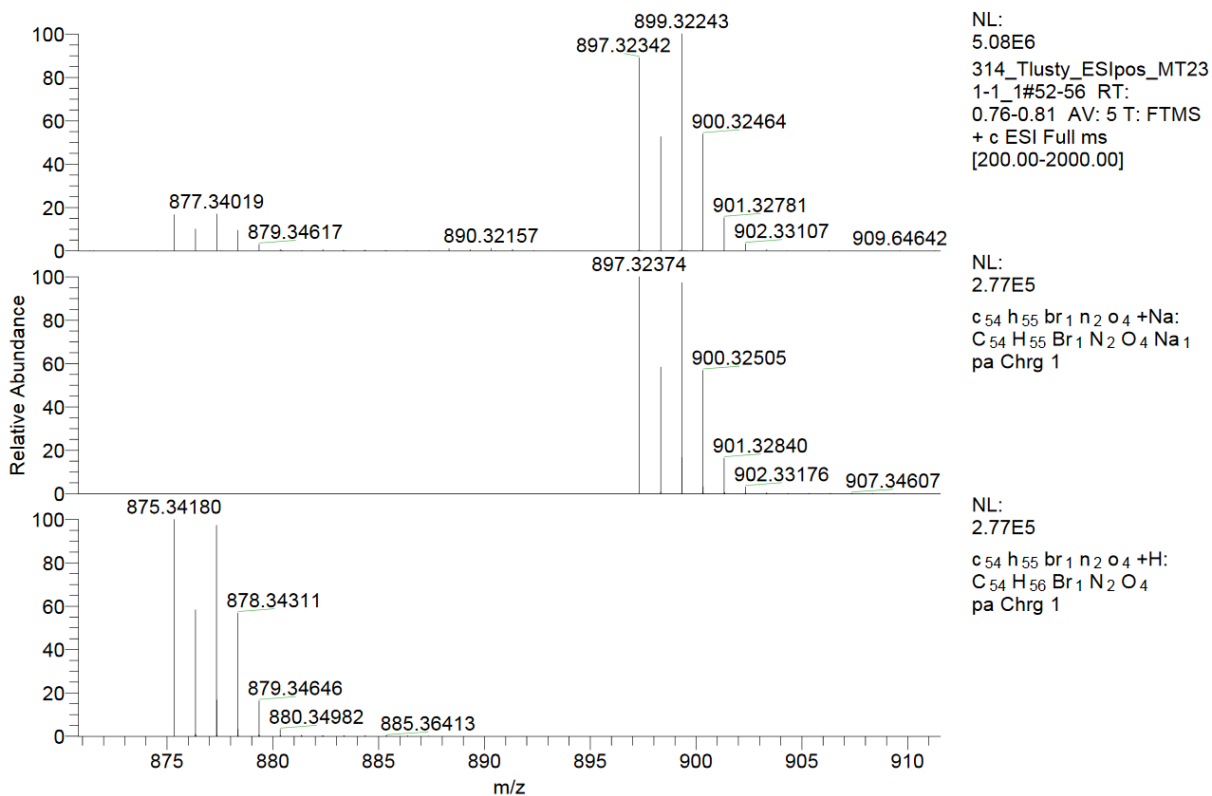

Figure 26: HRMS of compound **8ab** (ESI<sup>+</sup>).

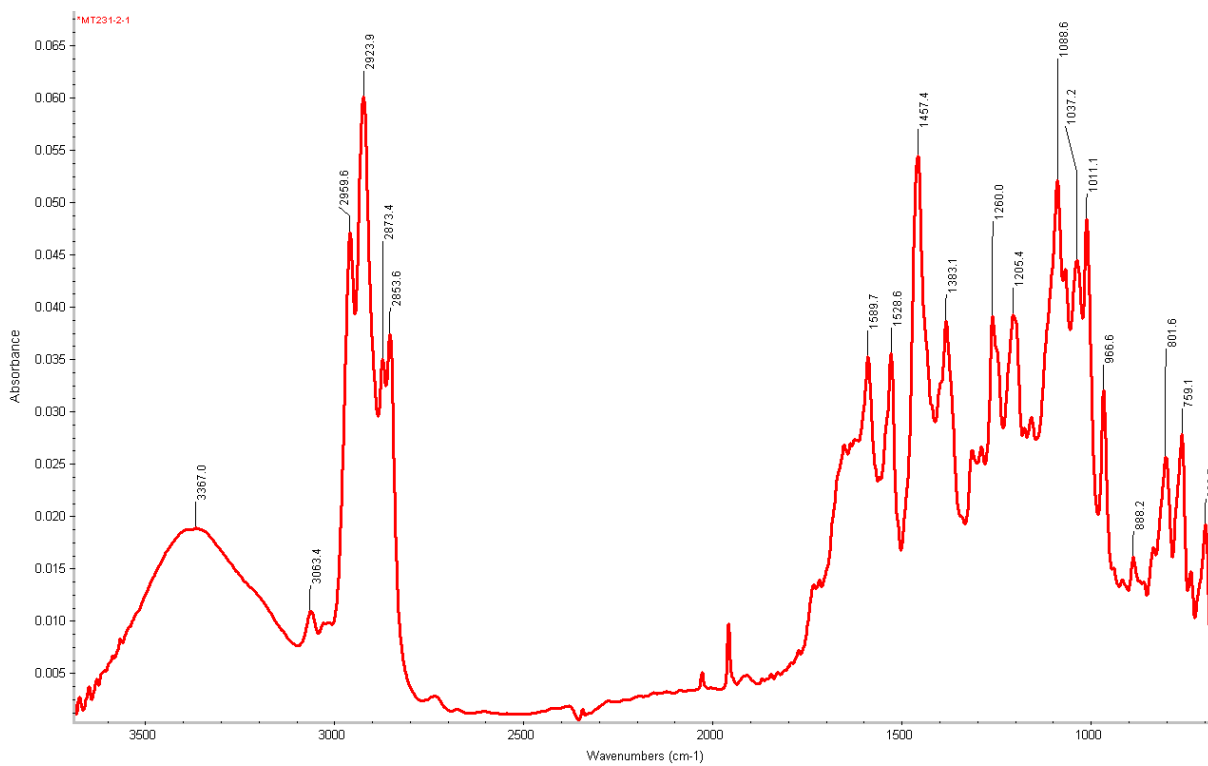

Figure 27: IR of compound **8ab** (KBr).

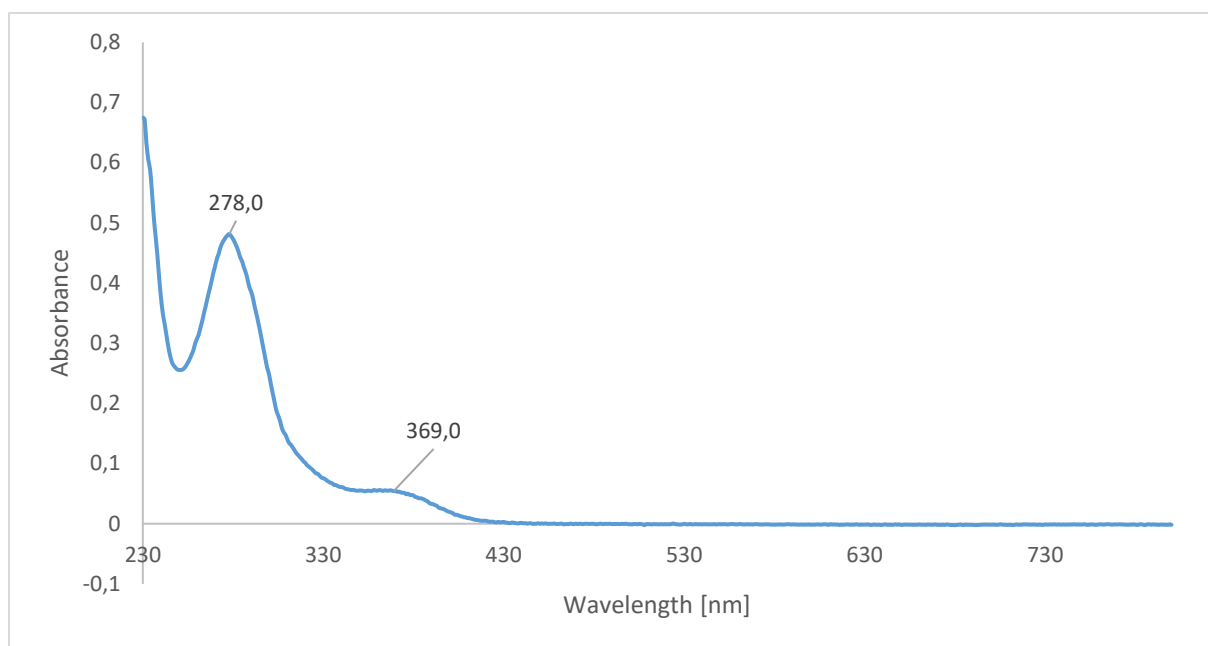

**Figure 28:** UV of compound **8ab** ( $\text{CH}_2\text{Cl}_2$ ).

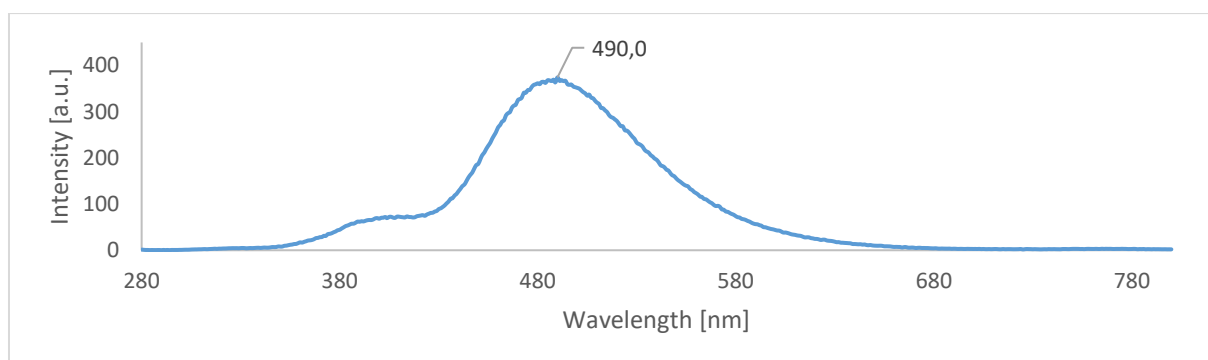

**Figure 29:** Fluorescence of compound **8ab** ( $\text{CH}_2\text{Cl}_2$ , excitation wavelength 278 nm).

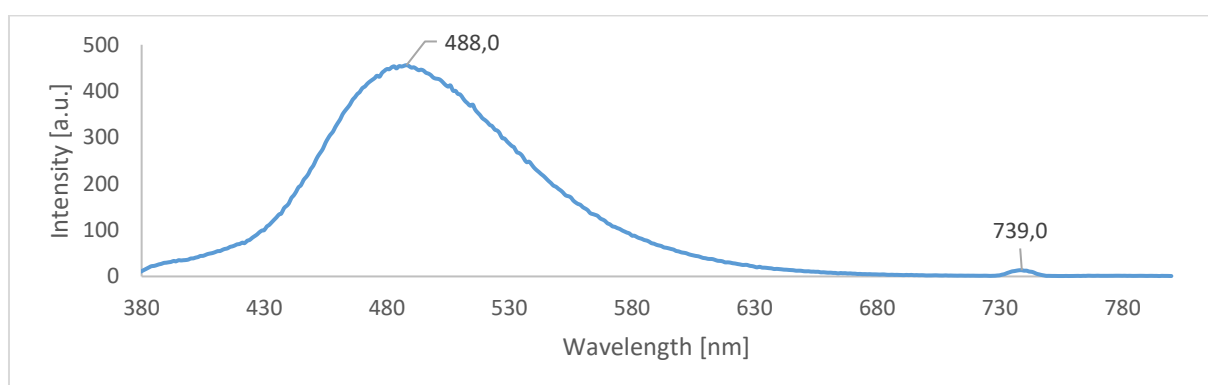

**Figure 30:** Fluorescence of compound **8ab** ( $\text{CH}_2\text{Cl}_2$ , excitation wavelength 370 nm).

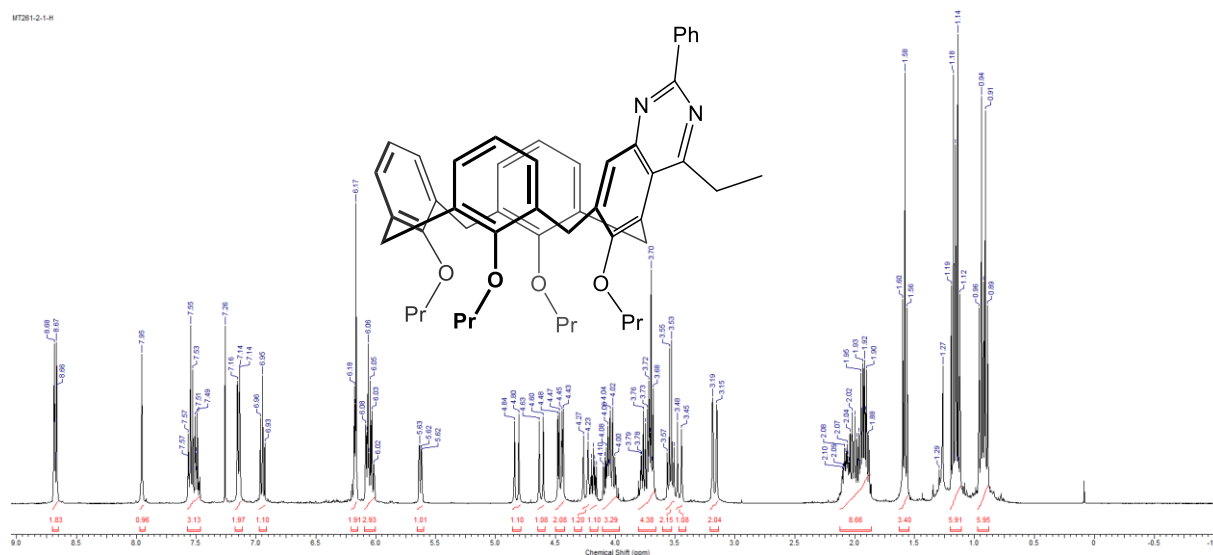

Figure 31:  $^1\text{H}$  NMR of compound **8ac** ( $\text{CDCl}_3$ , 400 MHz).

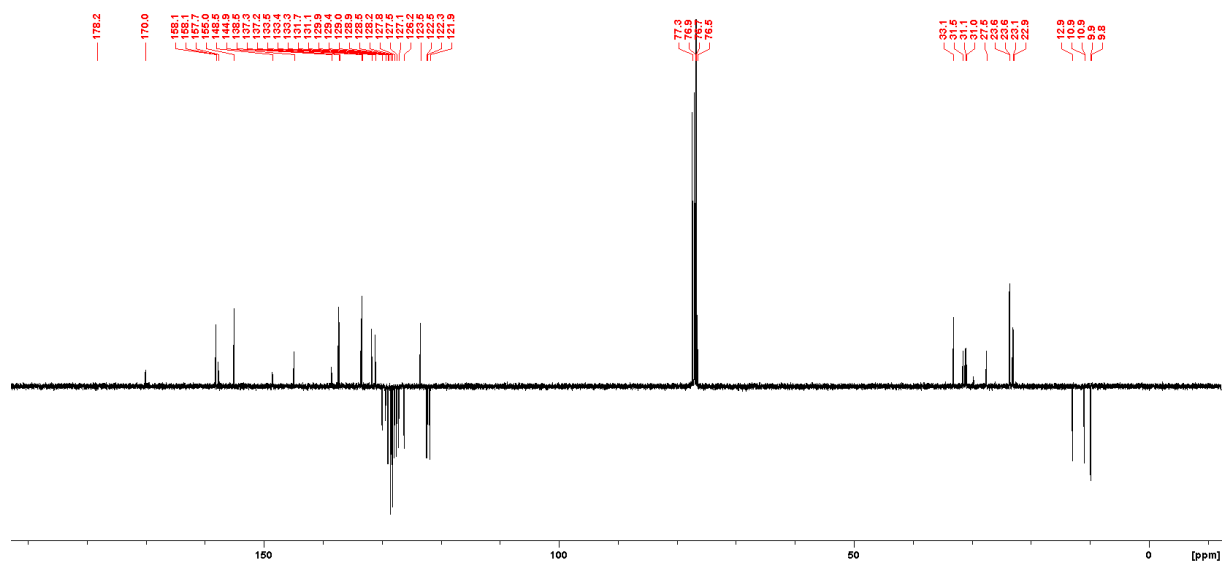

Figure 32:  $^{13}\text{C}$ (APT) NMR of compound **8ac** ( $\text{CDCl}_3$ , 100 MHz).



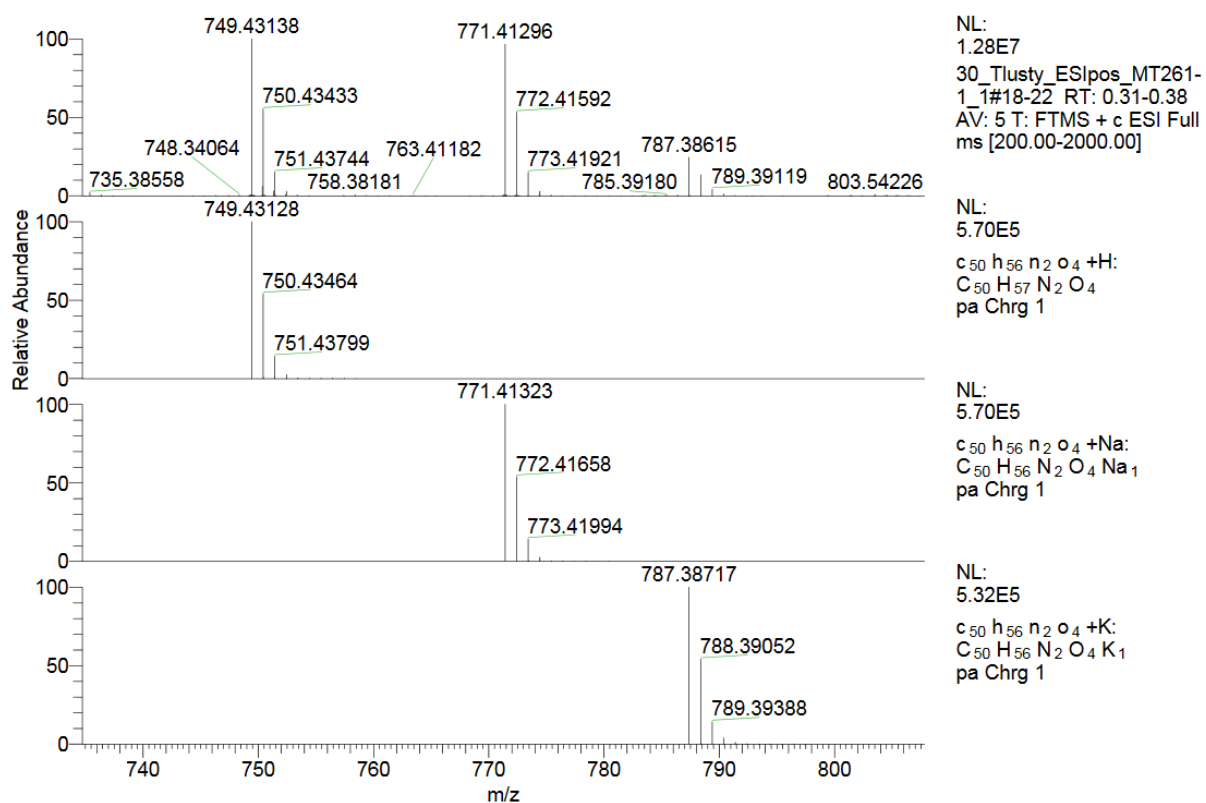

Figure 33: HRMS of compound **8ac** (ESI<sup>+</sup>).

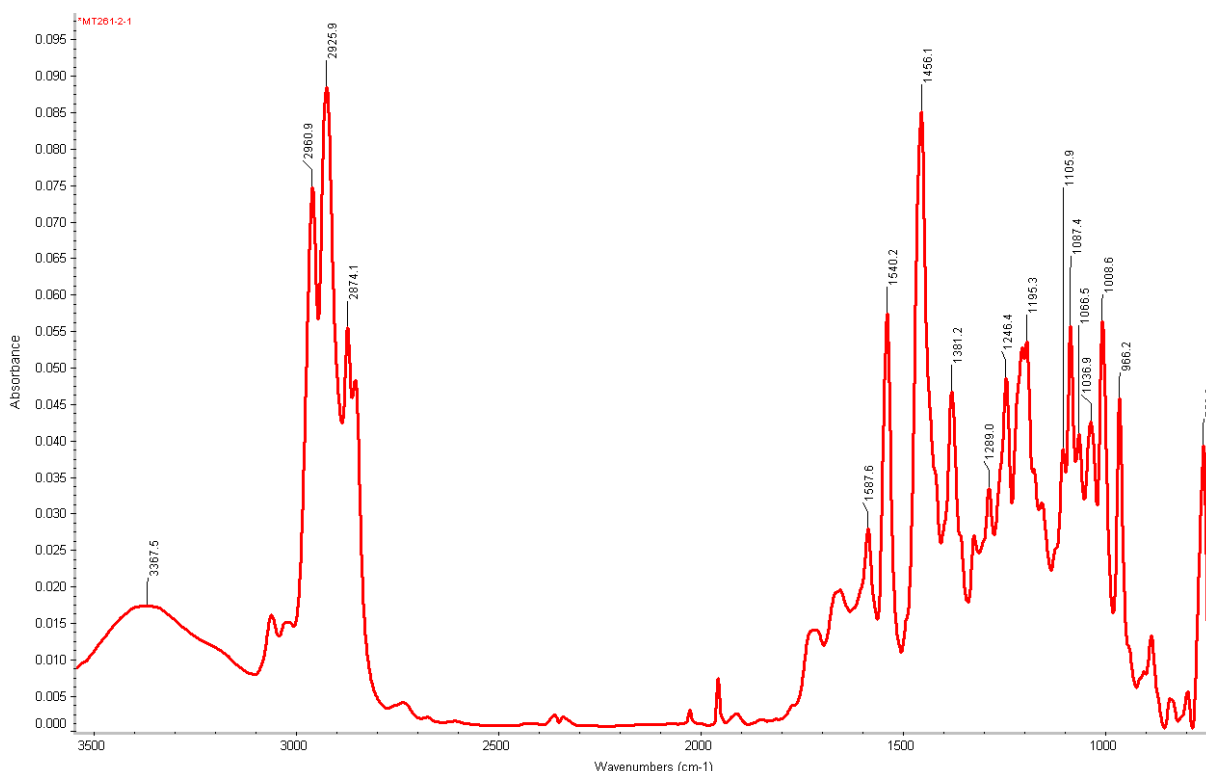

Figure 34: IR of compound **8ac** (KBr).

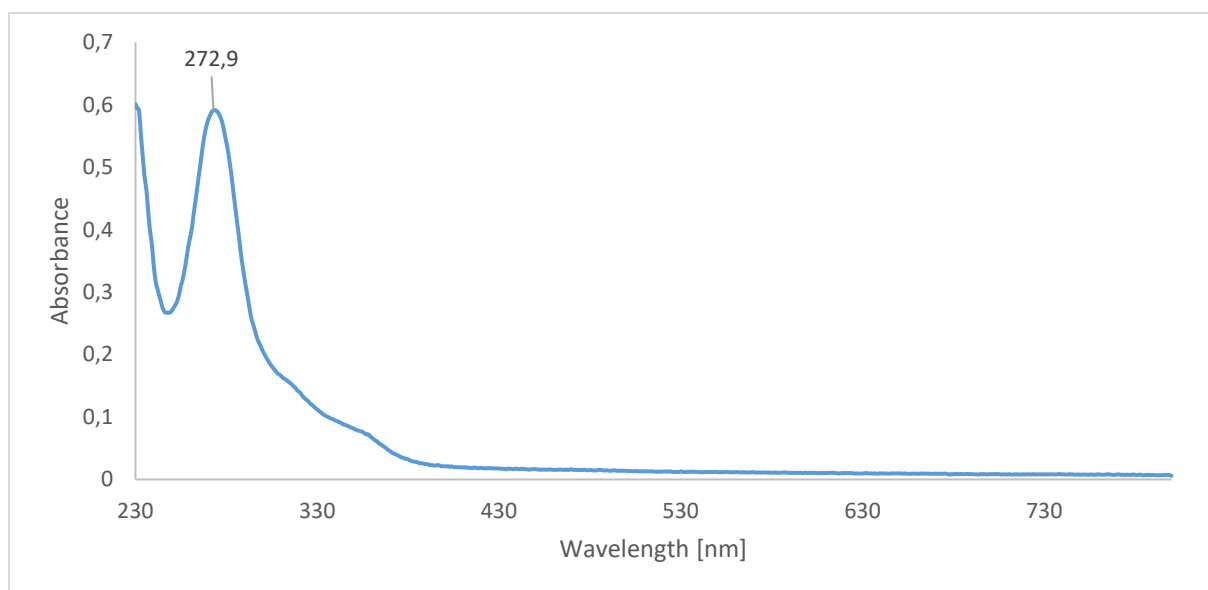

**Figure 35:** UV of compound **8ac** ( $\text{CH}_2\text{Cl}_2$ ).

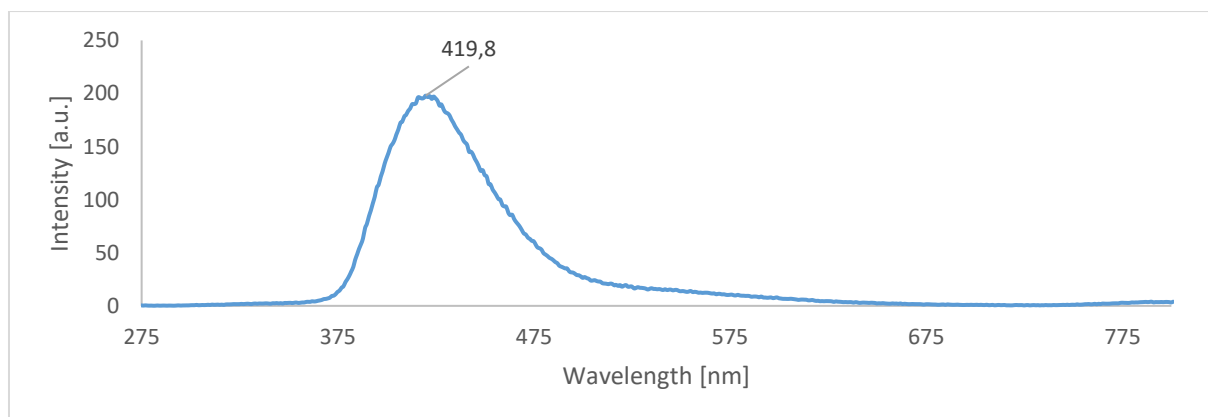

**Figure 36:** Fluorescence of compound **8ac** ( $\text{CH}_2\text{Cl}_2$ , excitation wavelength 273 nm).



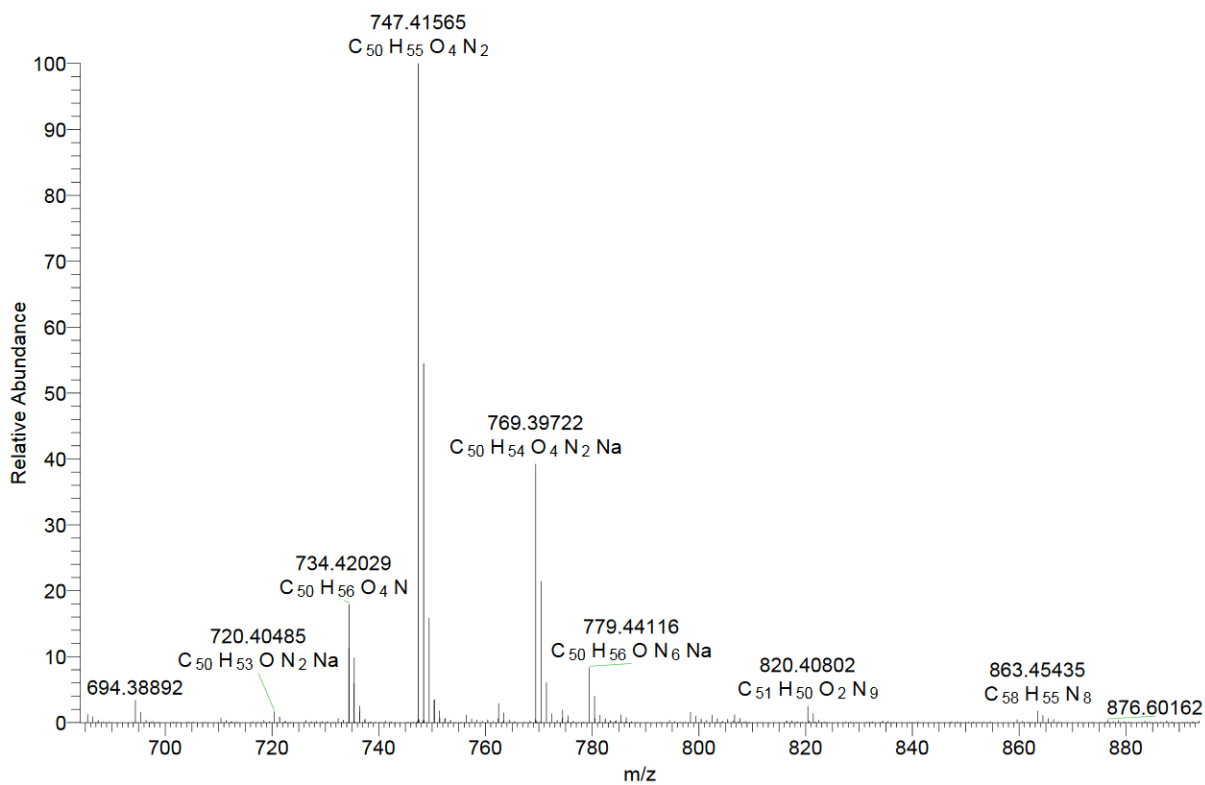

**Figure 39:** HRMS of compound **8ad** (ESI<sup>+</sup>).

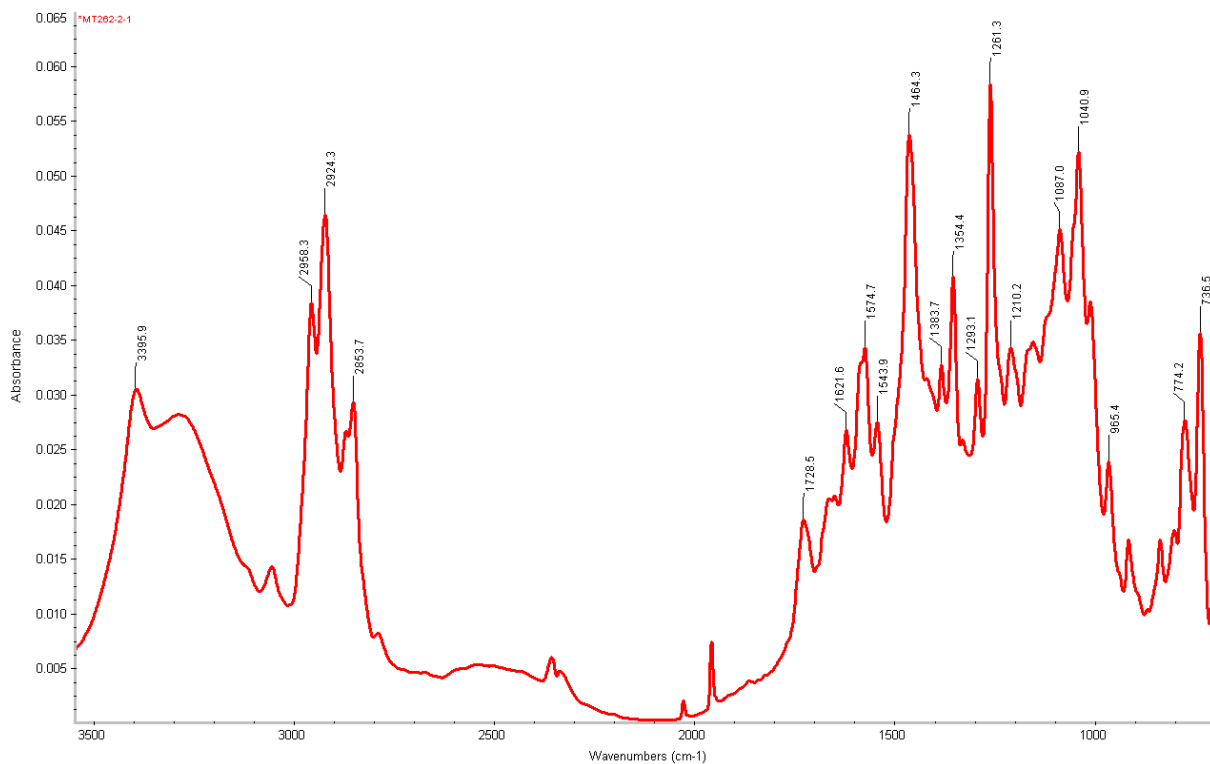

**Figure 40:** IR of compound **8ad** (KBr).

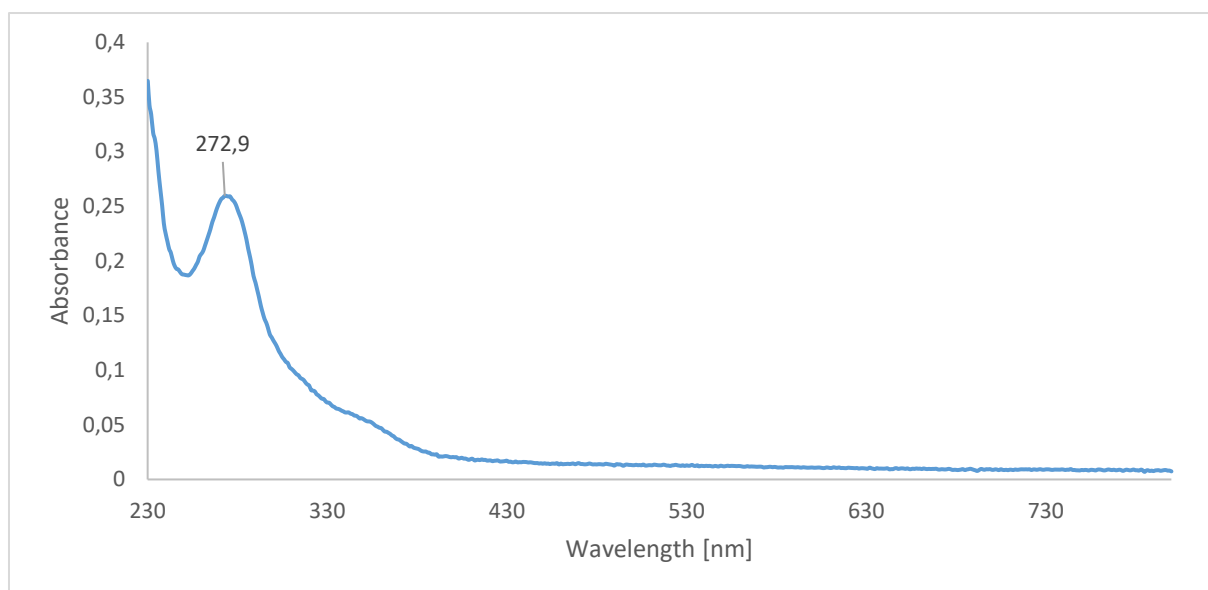

**Figure 41:** UV of compound **8ad** ( $\text{CH}_2\text{Cl}_2$ ).

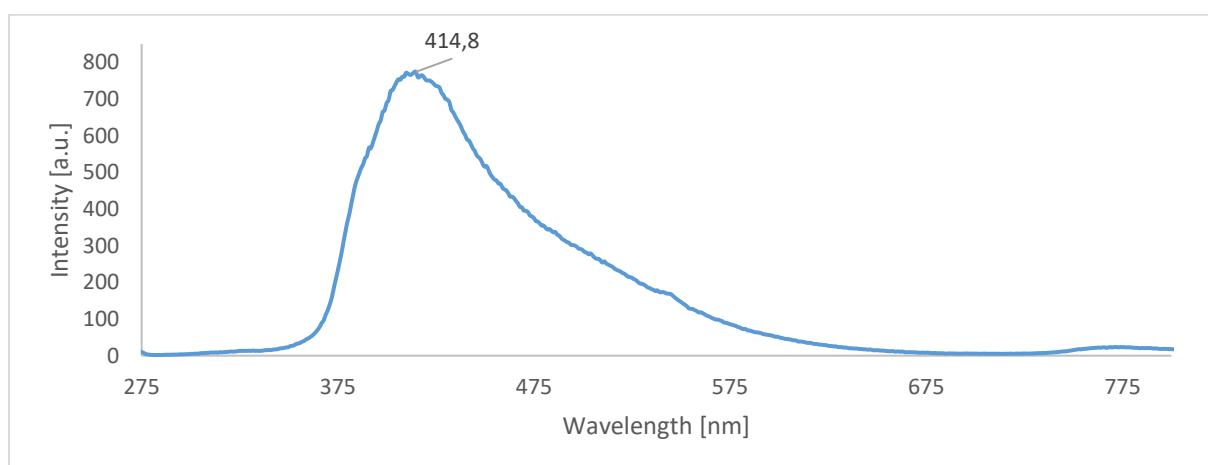

**Figure 42:** Fluorescence of compound **8ad** ( $\text{CH}_2\text{Cl}_2$ , excitation wavelength 273 nm).

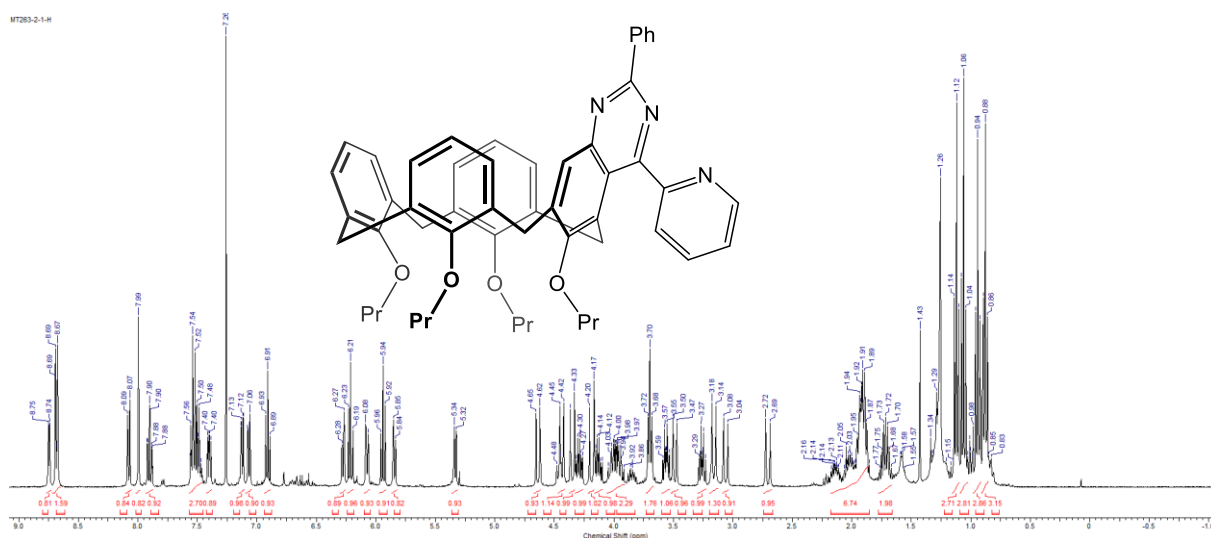

**Figure 43:**  $^1\text{H}$  NMR of compound **8ae** ( $\text{CDCl}_3$ , 400 MHz).

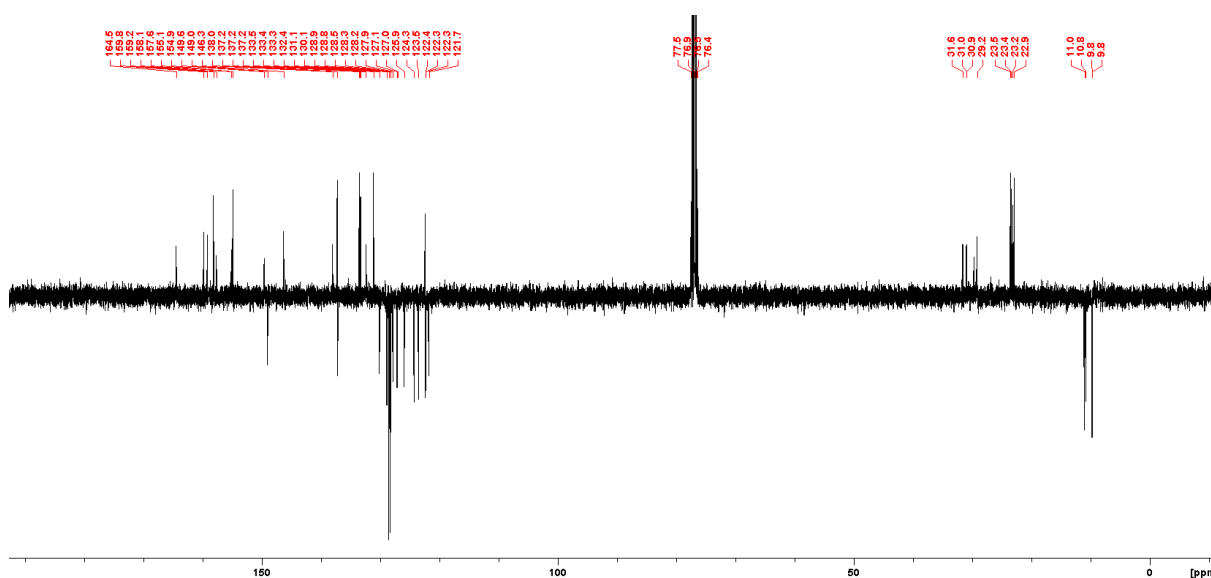

**Figure 44:**  $^{13}\text{C}$ (APT) NMR of compound **8ae** ( $\text{CDCl}_3$ , 100 MHz).

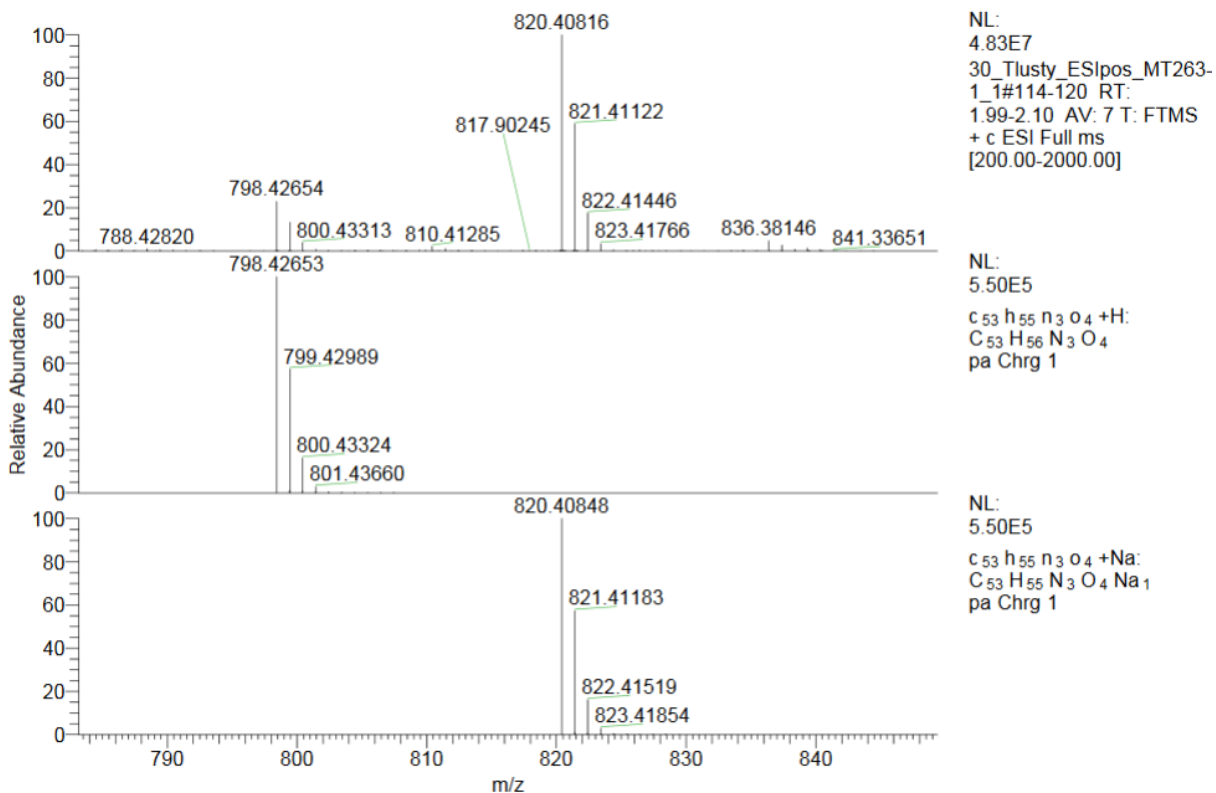

Figure 45: HRMS of compound 8ae (ESI<sup>+</sup>).

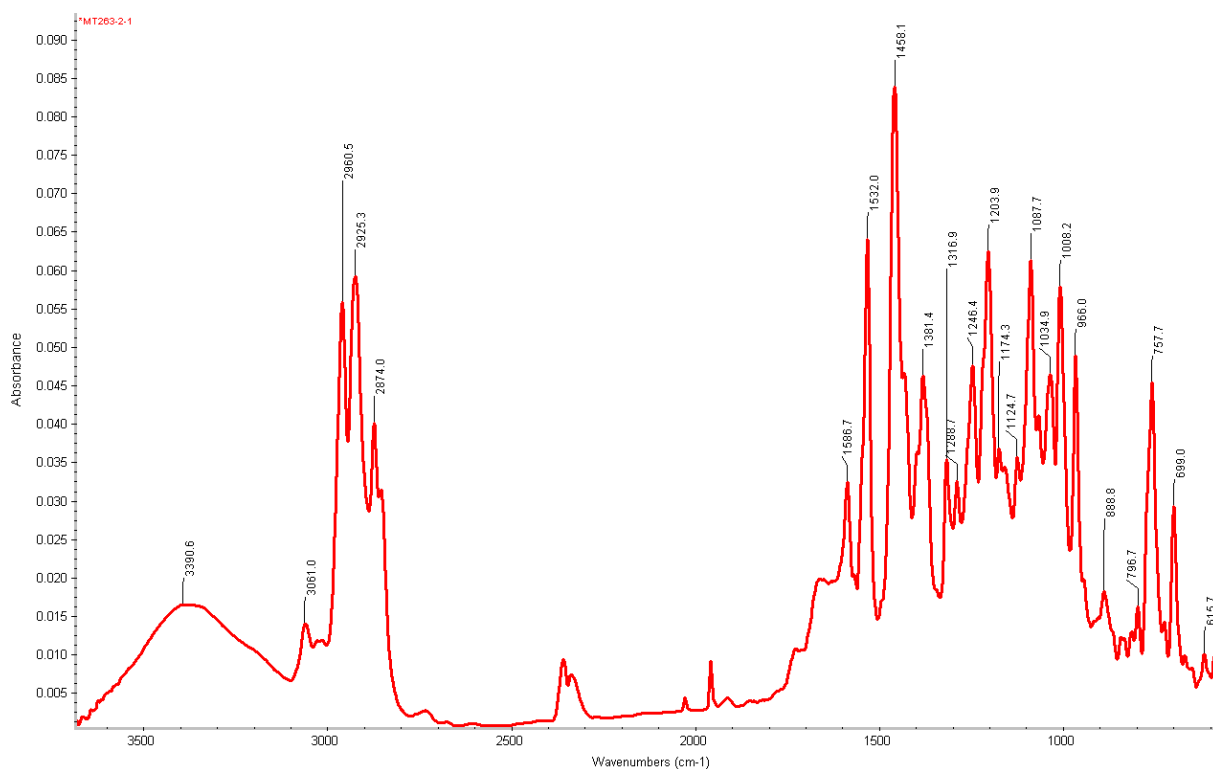

Figure 46: IR of compound 8ae (KBr).

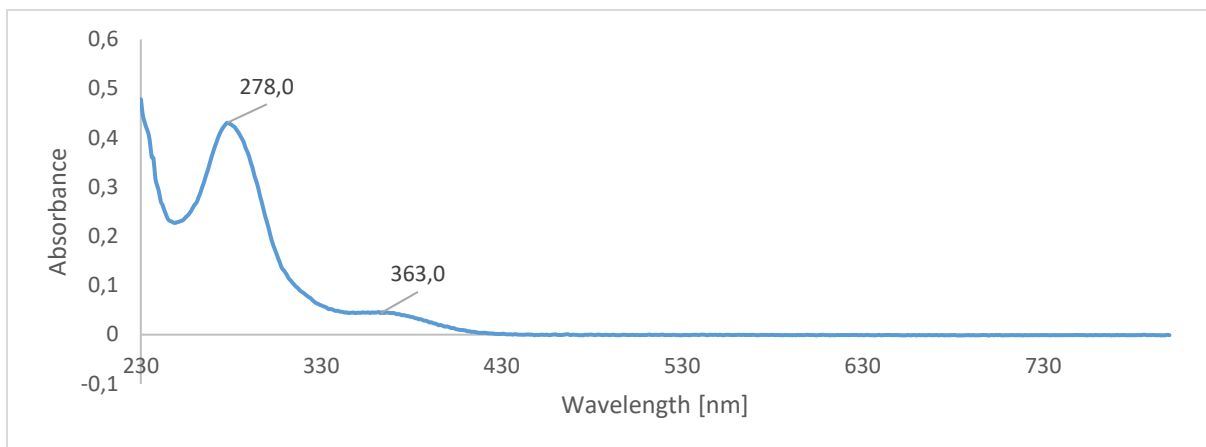

**Figure 47:** UV of compound **8ae** ( $\text{CH}_2\text{Cl}_2$ ).

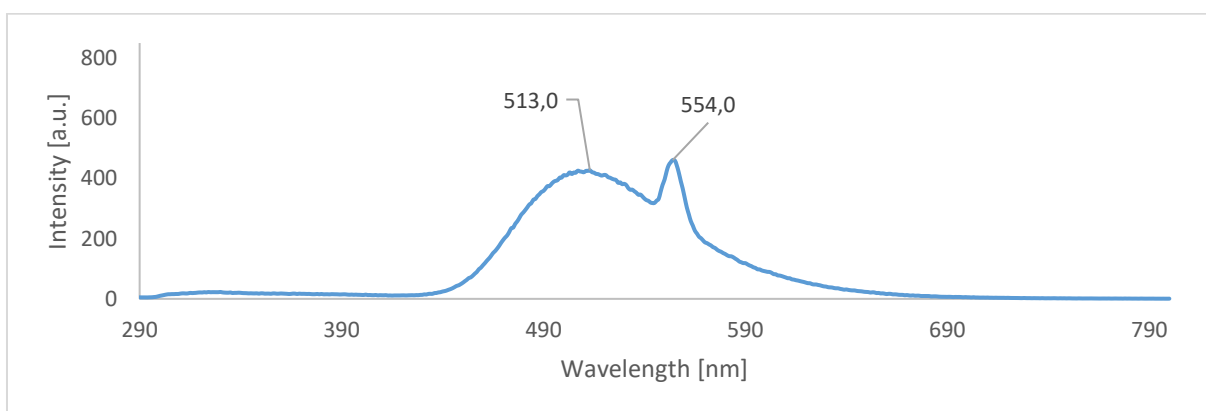

**Figure 48:** Fluorescence of compound **8ae** ( $\text{CH}_2\text{Cl}_2$ , excitation wavelength 278 nm).

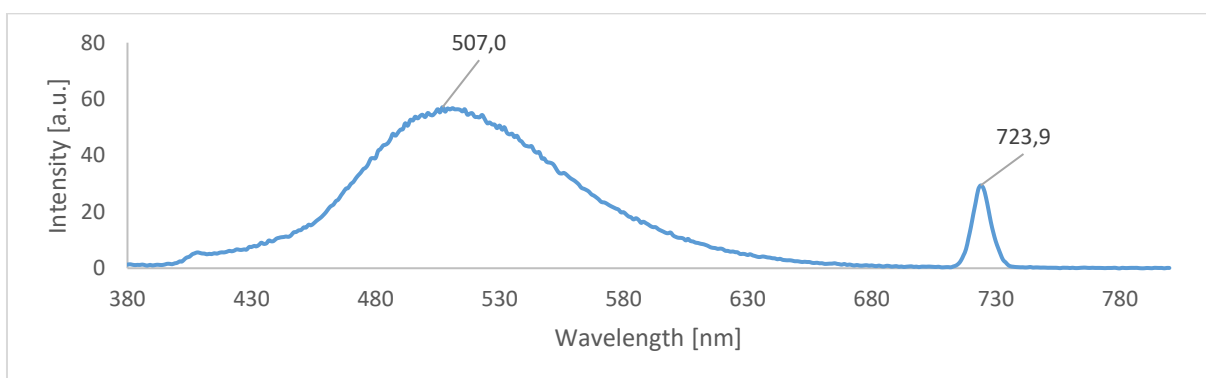

**Figure 49:** Fluorescence of compound **8ae** ( $\text{CH}_2\text{Cl}_2$ , excitation wavelength 363 nm).





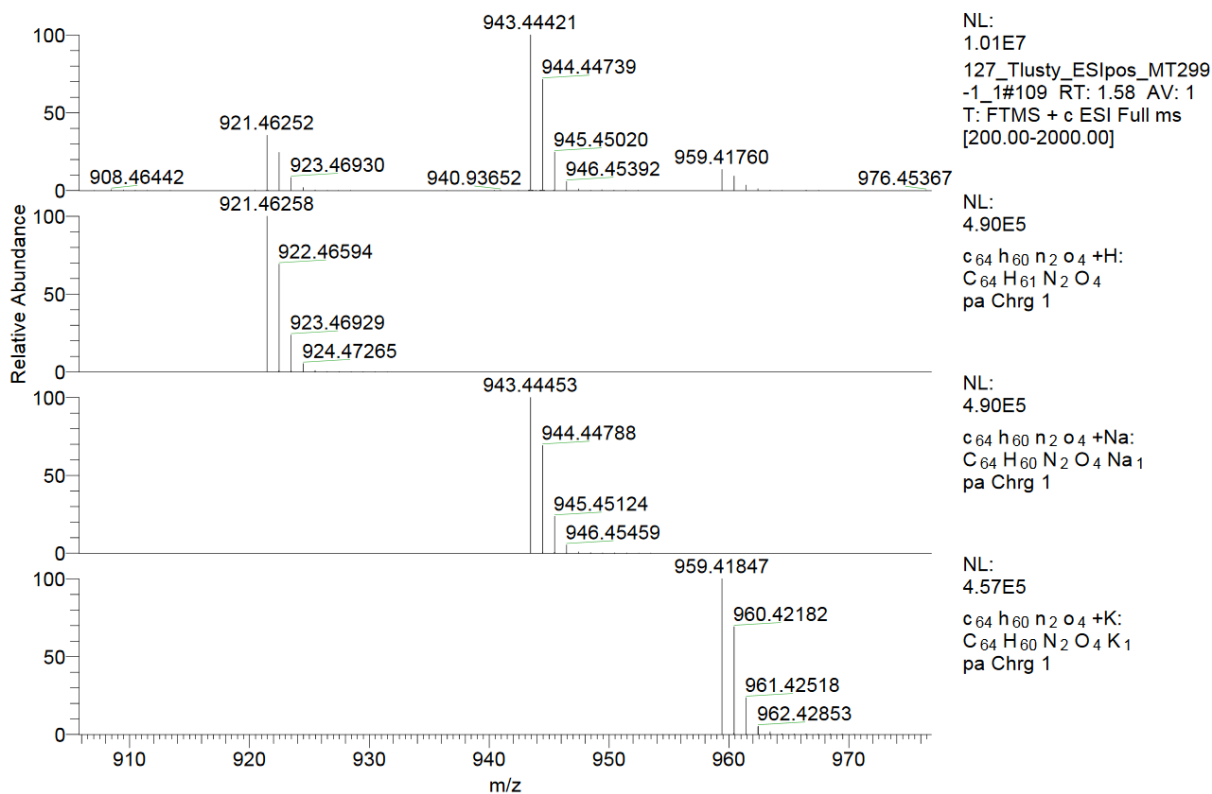

Figure 52: HRMS of compound **8ba** (ESI<sup>+</sup>).

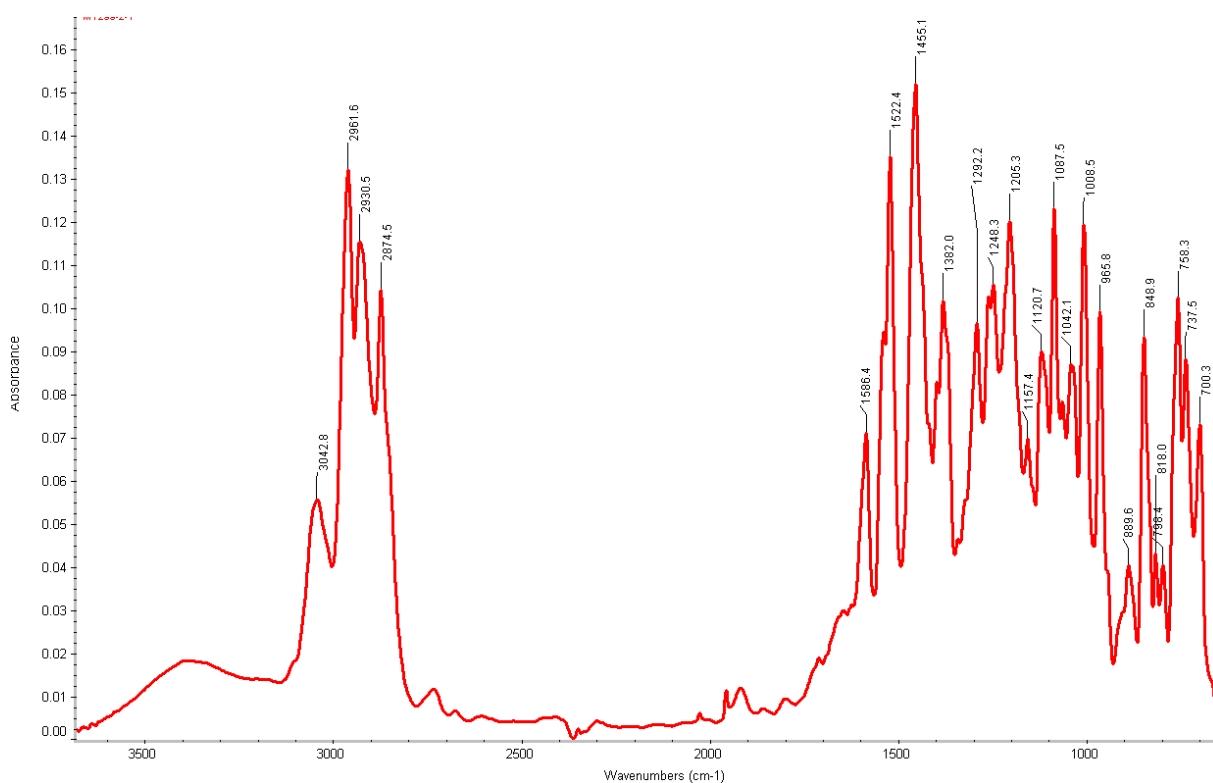

Figure 53: IR of compound **8ba** (KBr).

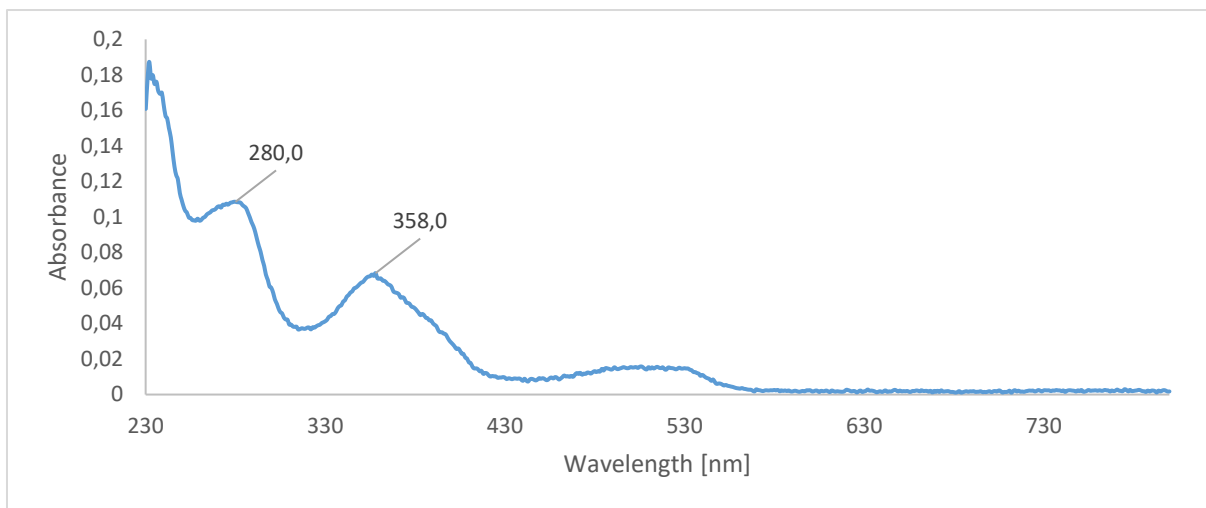

**Figure 54:** UV of compound **8ba** ( $\text{CH}_2\text{Cl}_2$ ).

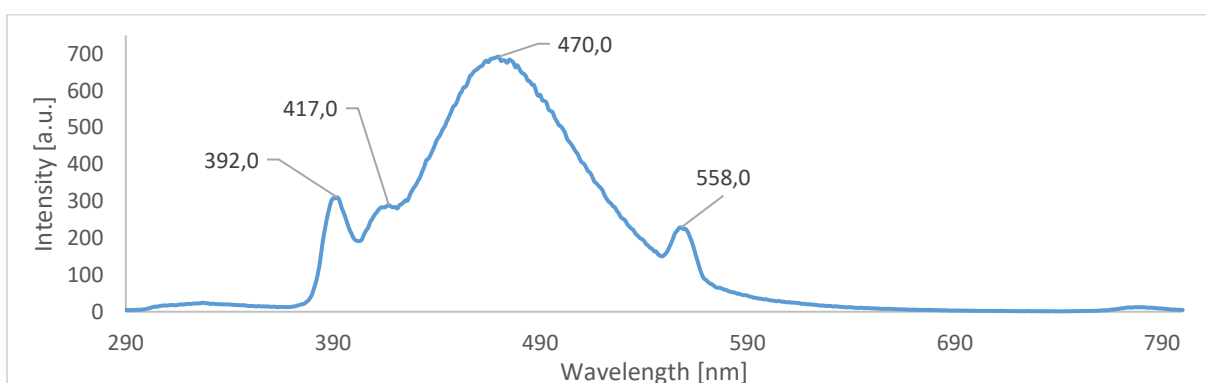

**Figure 55:** Fluorescence of compound **8ba** ( $\text{CH}_2\text{Cl}_2$ , excitation wavelength 280 nm).

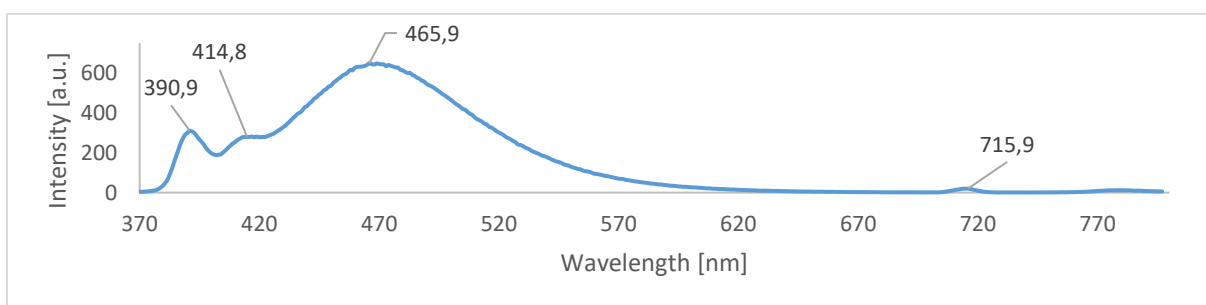

**Figure 56:** Fluorescence of compound **8ba** ( $\text{CH}_2\text{Cl}_2$ , excitation wavelength 358 nm).

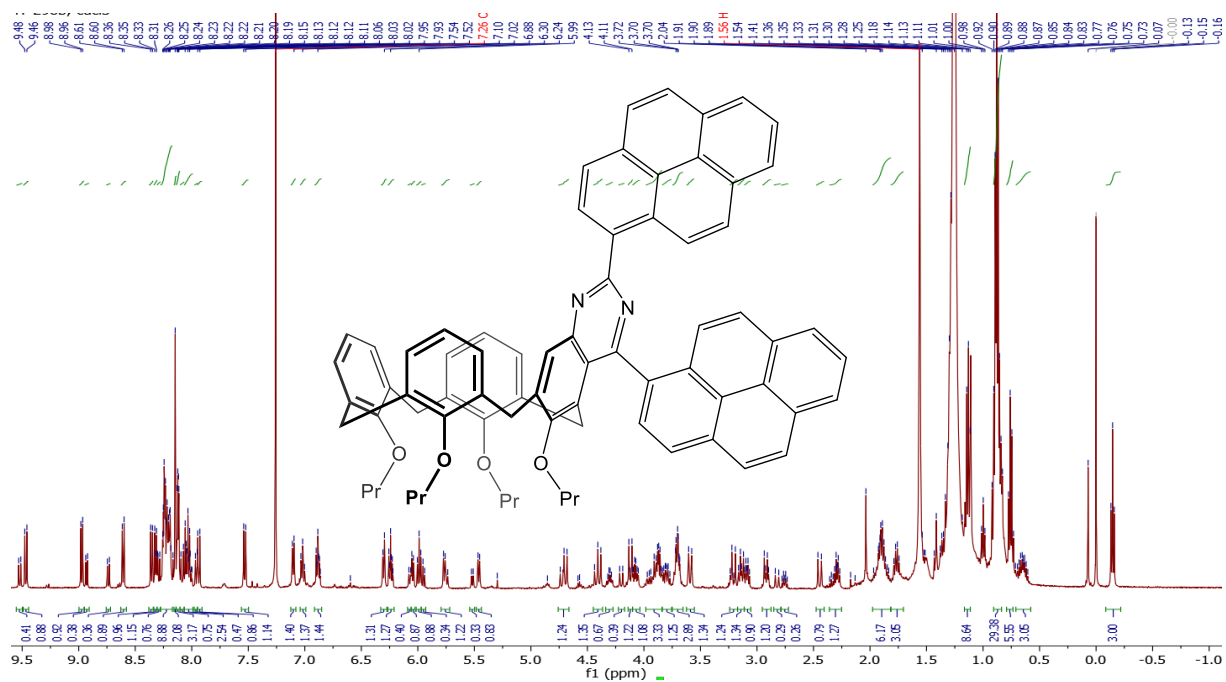

Figure 57:  $^1\text{H}$  NMR of compound **8bb** ( $\text{CDCl}_3$ , 400 MHz).

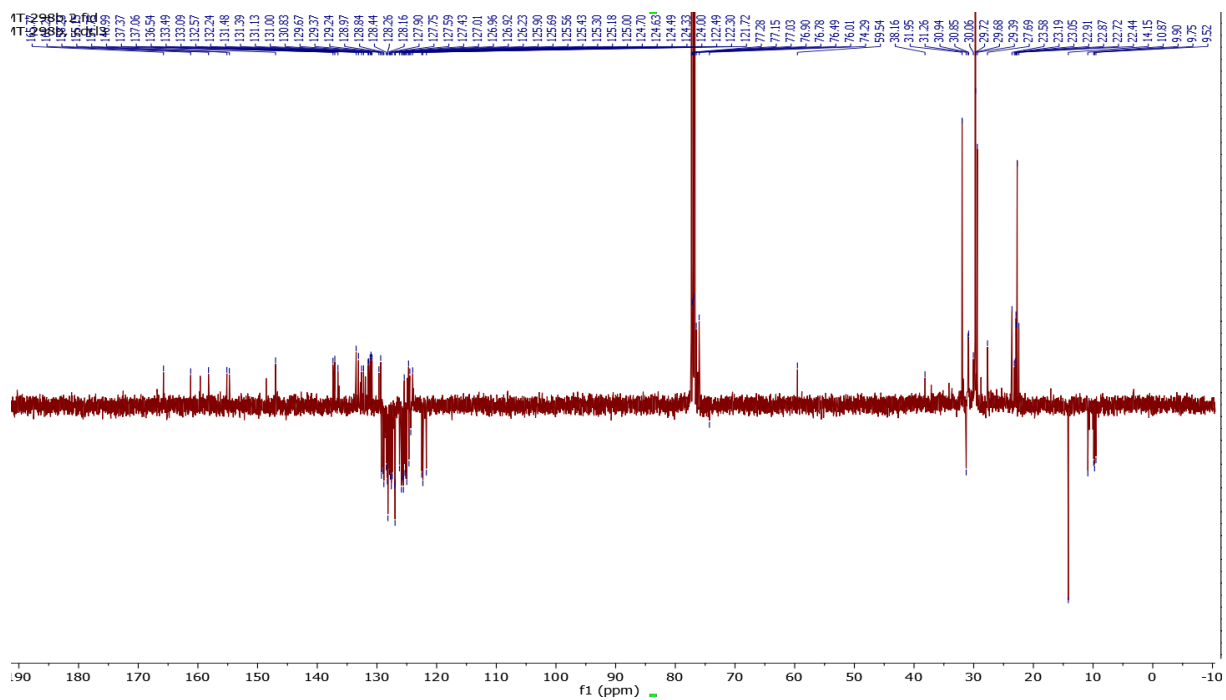

Figure 58:  $^{13}\text{C}$  (APT) NMR of compound **8bb** ( $\text{CDCl}_3$ , 100 MHz).

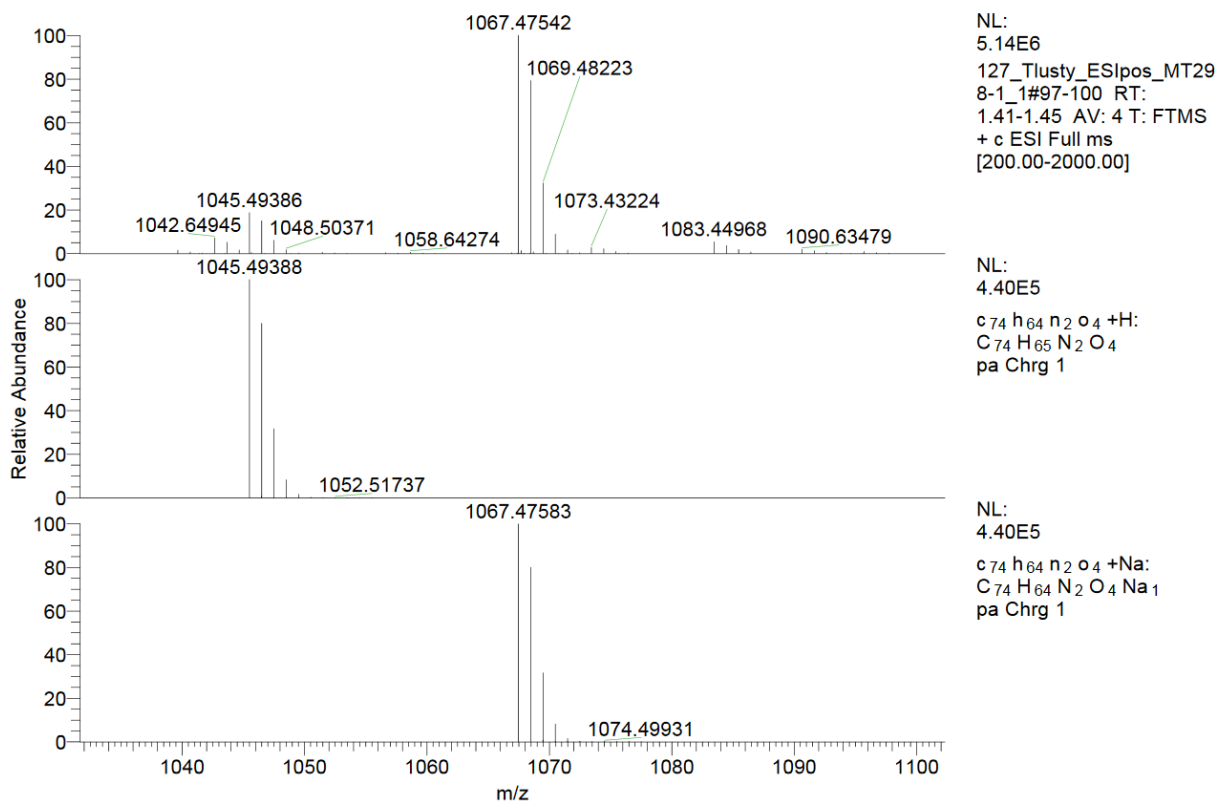

**Figure 59:** HRMS of compound **8bb** (ESI<sup>+</sup>).

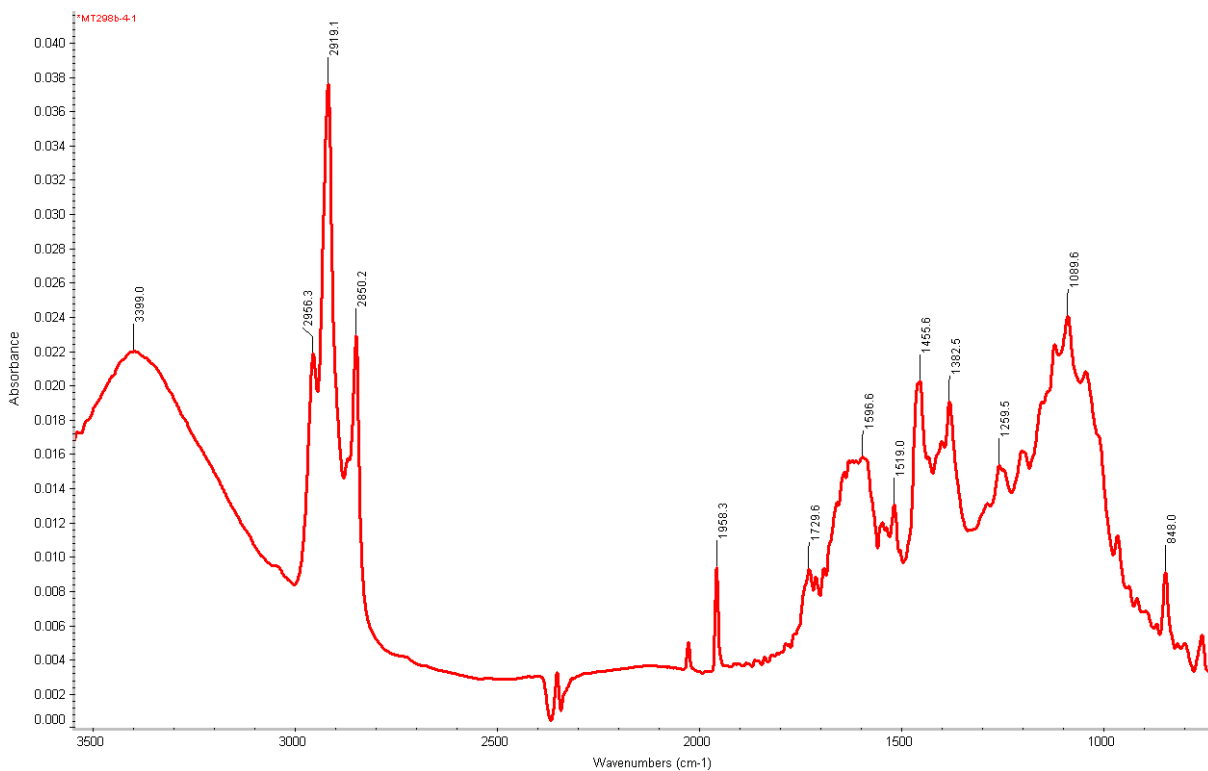

**Figure 60:** IR of compound **8bb** (KBr).

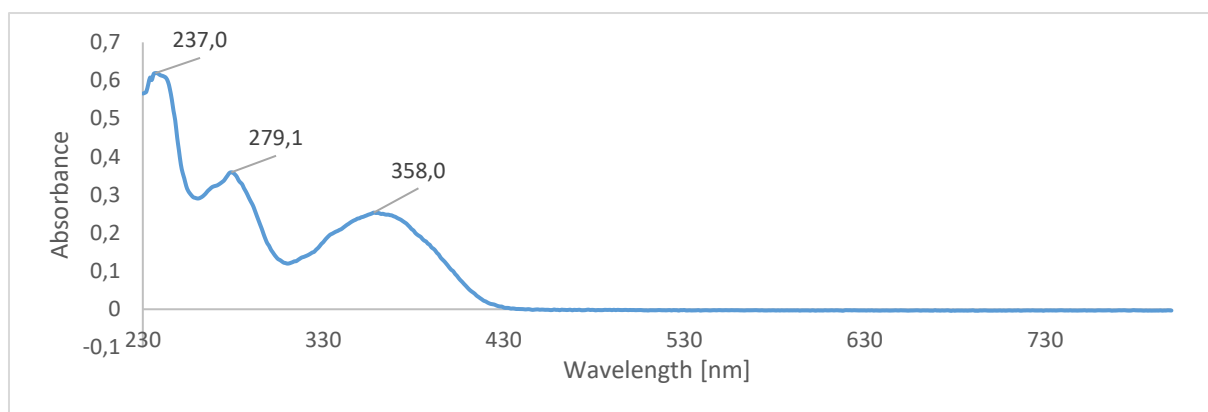

**Figure 61:** UV of compound **8bb** ( $\text{CH}_2\text{Cl}_2$ ).

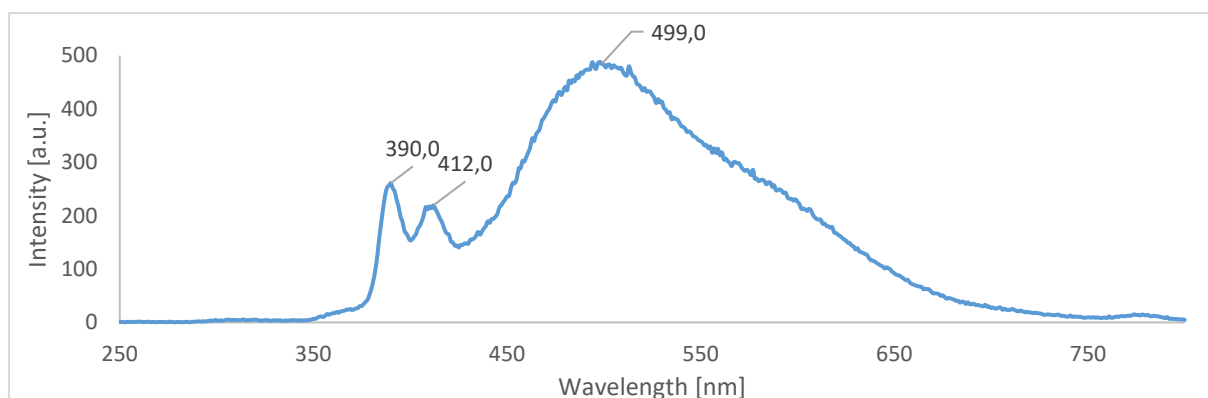

**Figure 62:** Fluorescence of compound **8bb** ( $\text{CH}_2\text{Cl}_2$ , excitation wavelength 237 nm).

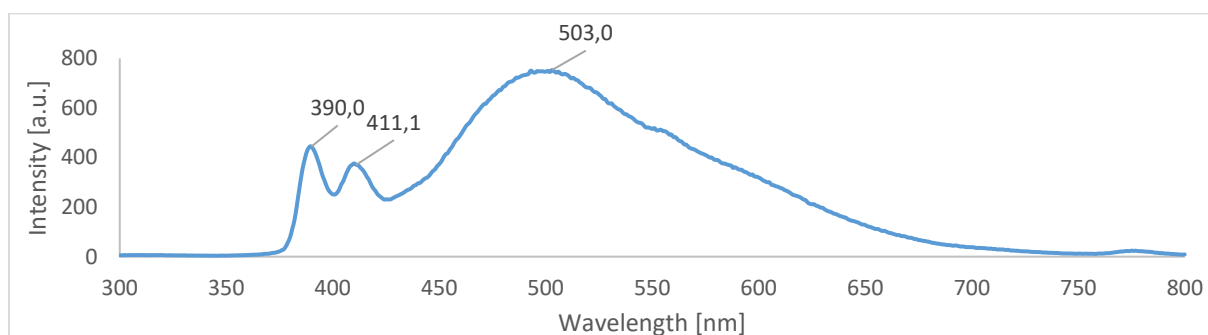

**Figure 63:** Fluorescence of compound **8bb** ( $\text{CH}_2\text{Cl}_2$ , excitation wavelength 279 nm).

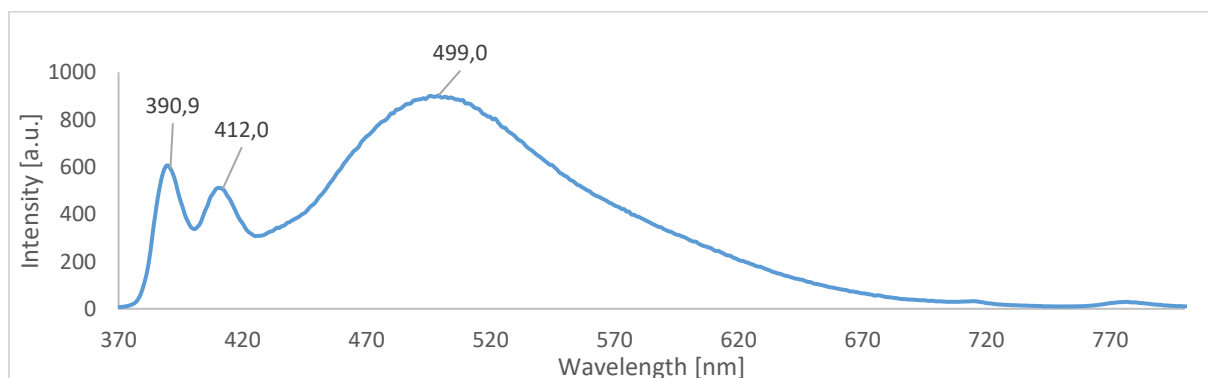

**Figure 64:** Fluorescence of compound **8bb** ( $\text{CH}_2\text{Cl}_2$ , excitation wavelength 358 nm).

## 2. Dynamic NMR measurements

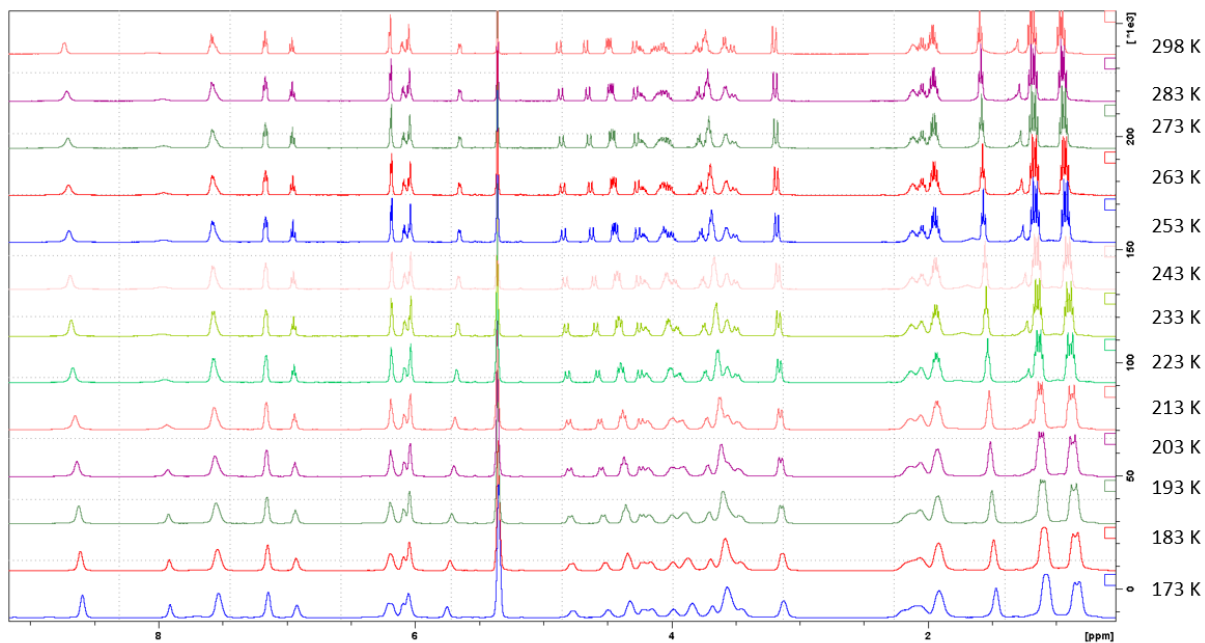

**Figure 65:** Dynamic  $^1\text{H}$  NMR measurements of **8ac** (298 – 173 K,  $\text{CD}_2\text{Cl}_2$ , 500 MHz)

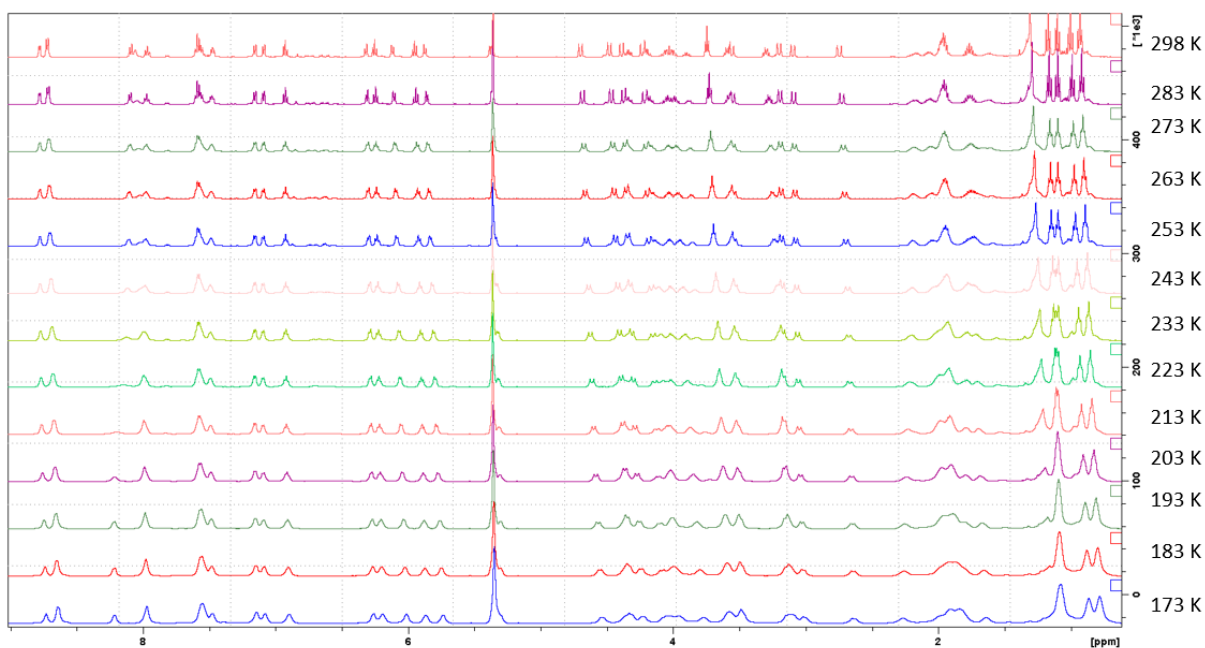

**Figure 66:** Dynamic  $^1\text{H}$  NMR measurements of **8ae** (298 – 173 K,  $\text{CD}_2\text{Cl}_2$ , 500 MHz)

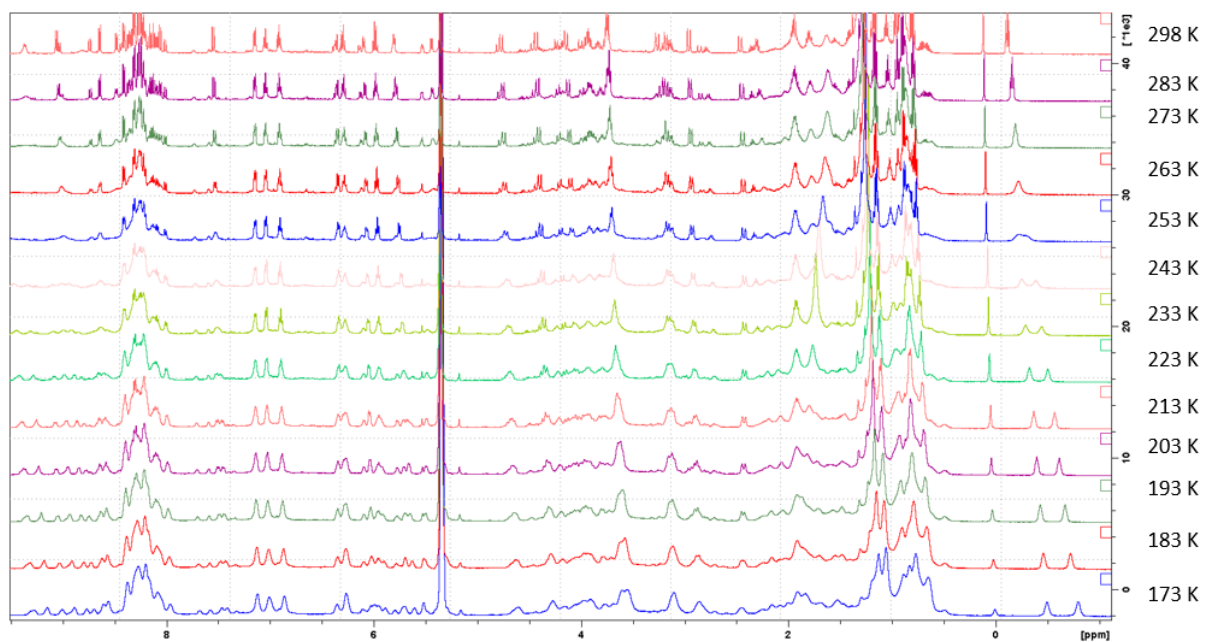

**Figure 67:** Dynamic <sup>1</sup>H NMR measurements of **8ae** (298 – 173 K, CD<sub>2</sub>Cl<sub>2</sub>, 500 MHz)



### 3. Chiral separation and ECD spectra

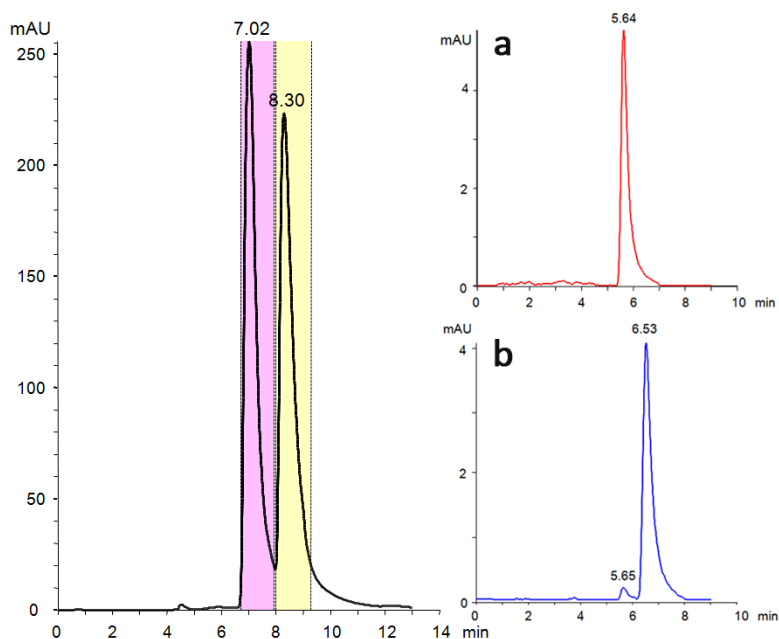

**Figure 68:** Preparative separation of **8aa** on Chiralpak IA (250×20 mm ID, 5  $\mu$ m); the collected intervals of peaks are marked in colour. The analytical fraction purity control on ChiralArt Amylose-SA (250×4.6 mm ID, 5  $\mu$ m) is depicted in the inset on the right: a) the first eluting enantiomer (**8aa-1**), b) the second eluting enantiomer (**8aa-2**).

The enantiomeric character of the separated substances **8aa-1** and **8aa-2** was verified by ECD spectroscopy using Jasco J-810 (Jasco).

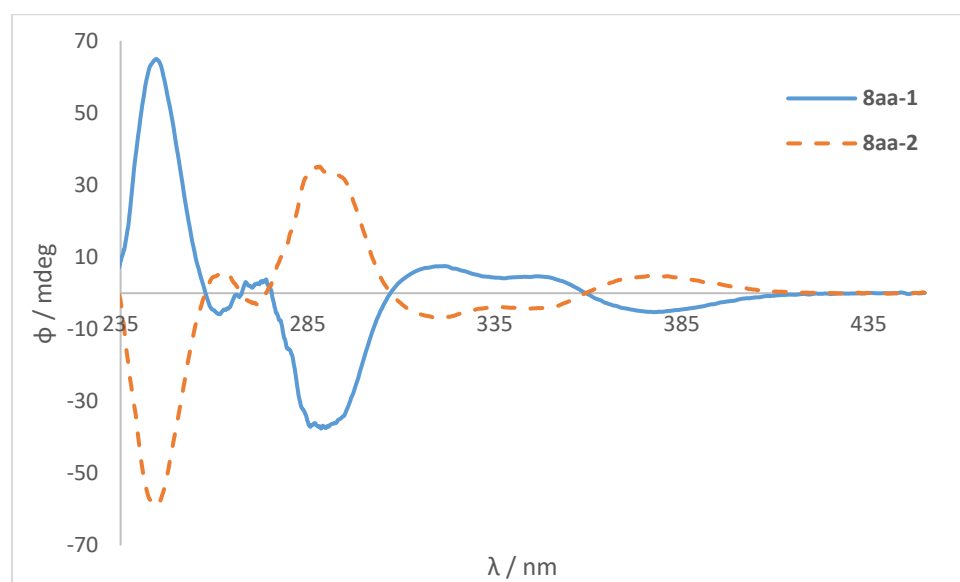

**Figure 69:** ECD spectra of both separated enantiomers of **8aa** in MeOH, the first eluting enantiomer **8aa-1** full (blue) line, the second eluting enantiomer **8aa-2** dashed (orange) line.

## 4. Crystallographic data

### *Crystallographic data for 8aa*

Data were collected at 180 (2) K on a D8 Venture Photon CMOS diffractometer with Incoatec microfocus sealed tube Cu-K $\alpha$  radiation.  $M = 813.07 \text{ g}\cdot\text{mol}^{-1}$ , monoclinic system, space group P21/c,  $a = 9.5527(2) \text{ \AA}$ ,  $b = 17.1196(4) \text{ \AA}$ ,  $c = 28.2418(6) \text{ \AA}$ ,  $\beta = 91.7686(8)^\circ$ ,  $Z = 4$ ,  $V = 4616.42(17) \text{ \AA}^3$ ,  $D_c = 1.170 \text{ g}\cdot\text{cm}^{-3}$ ,  $\mu(\text{Cu-K}\alpha) = 0.576 \text{ mm}^{-1}$ , crystal dimensions of  $0.169 \times 0.185 \times 0.449 \text{ mm}$ . The structure was solved by direct methods<sup>17</sup> and anisotropically refined by full matrix least squares on F squared using the CRYSTALS suite of programs<sup>18</sup> to final value  $R = 0.059$  and  $wR = 0.155$  using 9364 independent reflections ( $\Theta_{\text{max}} = 74.4^\circ$ ), 560 parameters and 0 restraints. The hydrogen atoms were placed in calculated positions and refined with riding constraints. The structure was deposited into Cambridge Structural Database under number CCDC 1985895.

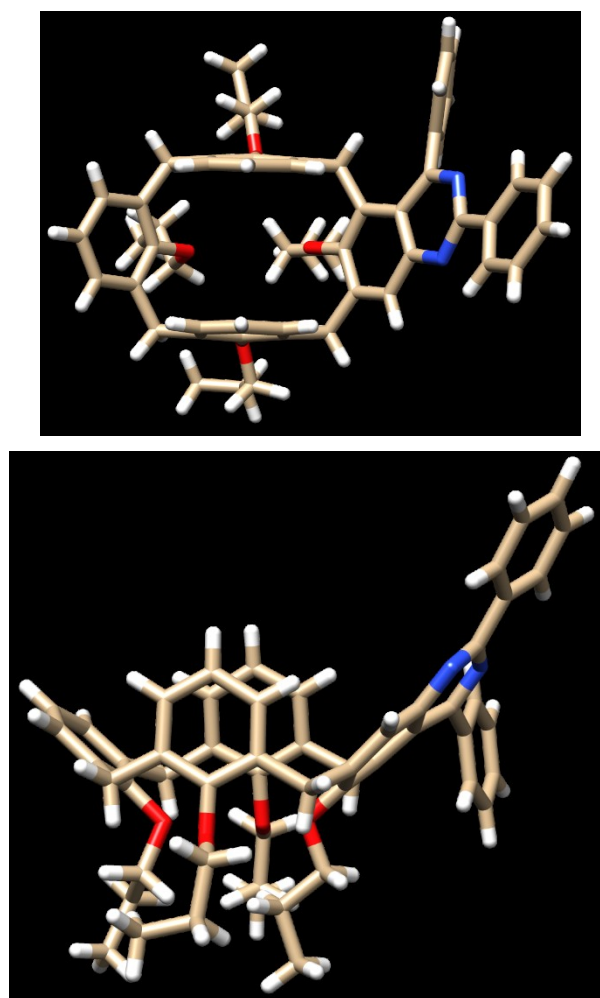

**Figure 70:** X-ray structure of compound **8aa**

17. A. Altomare, G. Cascarano, C. Giacovazzo, A. Guagliardi, M. C. Burla, G. Polidori and M. Camalli, *J. Appl. Crystallogr.*, 1994, **27**, 435-436.

18. P. W. Betteridge, J. R. Carruthers, R. I. Cooper, K. Prout and D. J. Watkin, *J. Appl. Crystallogr.*, 2003, **36**, 1487.

## 5. Titration experiments

Calixarene **8aa** was dissolved in specified amount of  $\text{CH}_2\text{Cl}_2$  (solution 1). 0.9 ml of calixarene solution 1 was put in a volumetric flask and diluted to total volume of 5 ml (solution 2). 2.5 ml of solution 2 was put to a fluorescence cuvette. Specified amount of *N*-methylquinolinium iodide (NMQI) was put to another volumetric flask, 0.9 ml of solution 1 was added and the solution was diluted to total volume of 5 ml (solution 3). The aliquots of NMQI were gradually added to fluorescence tube to achieve different calixarene/guest ratios (1:0.000–29.258), ensuring constant host concentration during the experiment. The complexation constants were determined by analyzing fluorescence intensity using nonlinear curve-fitting procedure (program BindFit).

|    | V (total) [ml] | V(addition, total) [ml] | V(addition) [ml] | c(NMQI) [mol/l] | c(8aa) [mol/l] | c(NMQI)/c(8aa) | fluorescer | fluorescer | fluorescer |
|----|----------------|-------------------------|------------------|-----------------|----------------|----------------|------------|------------|------------|
| 1  | 2.500000       | 0.000000                | 0.000000         | 0.000000        | 0.000131       | 0.000000       | 259.4109   | 214.634    | 172.8671   |
| 2  | 2.503000       | 0.003000                | 0.003000         | 0.000017        | 0.000131       | 0.131502       | 260.0261   | 216.1471   | 173.4606   |
| 3  | 2.510000       | 0.010000                | 0.007000         | 0.000057        | 0.000131       | 0.437119       | 255.4534   | 213.2857   | 168.7682   |
| 4  | 2.520000       | 0.020000                | 0.010000         | 0.000114        | 0.000131       | 0.870768       | 248.1394   | 210.6184   | 166.4995   |
| 5  | 2.535000       | 0.035000                | 0.015000         | 0.000198        | 0.000131       | 1.514828       | 220.8578   | 195.1219   | 153.7419   |
| 6  | 2.563000       | 0.063000                | 0.028000         | 0.000353        | 0.000131       | 2.696902       | 175.3186   | 163.8034   | 134.8889   |
| 7  | 2.613000       | 0.113000                | 0.050000         | 0.000621        | 0.000131       | 4.744738       | 130.4499   | 135.6293   | 112.7      |
| 8  | 2.681000       | 0.181000                | 0.068000         | 0.000970        | 0.000131       | 7.407216       | 82.97461   | 99.07418   | 84.9652    |
| 9  | 2.749000       | 0.249000                | 0.068000         | 0.001302        | 0.000131       | 9.937974       | 54.70518   | 74.07558   | 67.35785   |
| 10 | 2.500000       | 0.300000                | 0.300000         | 0.001725        | 0.000131       | 13.166019      | 31.80076   | 49.06158   | 46.55412   |
| 11 | 2.600000       | 0.400000                | 0.100000         | 0.002211        | 0.000131       | 16.879512      | 18.80015   | 35.57058   | 35.26059   |
| 12 | 2.700000       | 0.500000                | 0.100000         | 0.002661        | 0.000131       | 20.317931      | 13.07971   | 27.01264   | 26.90764   |
| 13 | 2.800000       | 0.600000                | 0.100000         | 0.003080        | 0.000131       | 23.510748      | 7.7923     | 19.87785   | 20.12643   |
| 14 | 2.900000       | 0.700000                | 0.100000         | 0.003469        | 0.000131       | 26.483372      | 5.599566   | 15.2689    | 16.598     |
| 15 | 3.000000       | 0.800000                | 0.100000         | 0.003832        | 0.000131       | 29.257820      | 3.624555   | 11.72142   | 13.00782   |

K 899.1  $\text{M}^{-1}$   
Error 53.0621847  $\text{M}^{-1}$

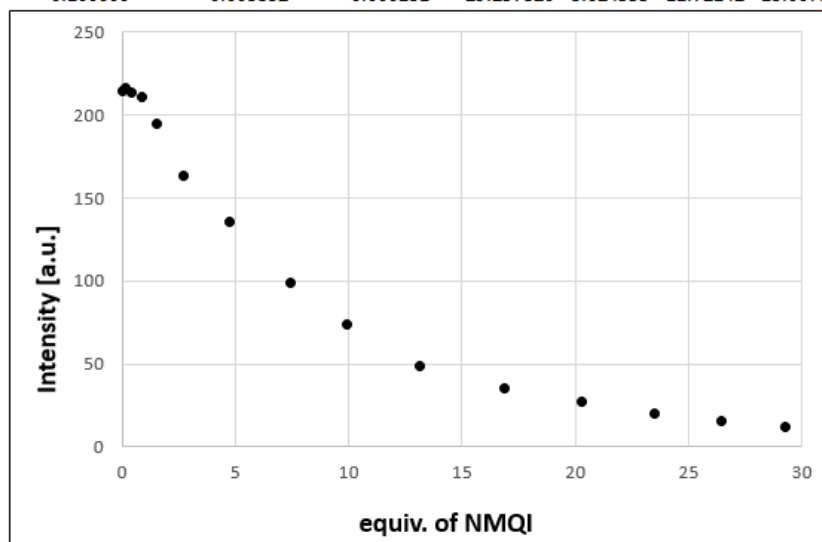

Figure 71:  $^1\text{H}$  NMR titration of compound **8aa** with NMQI ( $\text{CH}_2\text{Cl}_2$ ).

Calixarene **8aa** was dissolved in specified amount of CH<sub>2</sub>Cl<sub>2</sub> (solution 1). 0.9 ml of calixarene solution 1 was put in a volumetric flask and diluted to total volume of 5 ml (solution 2). 2.5 ml of solution 2 was put to a fluorescence cuvette. Specified amount of *N*-methylisoquinolinium iodide (NMII) was put to another volumetric flask, 0.9 ml of solution 1 was added and the solution was diluted to total volume of 5 ml (solution 3). The aliquots of NMII were gradually added to fluorescence tube to achieve different calixarene/guest ratios (1:0.000-29.829), ensuring constant host concentration during the experiment. The complexation constants were determined by analyzing fluorescence intensity using nonlinear curve-fitting procedure (program BindFit).

|    | V (total) [ml] | V(addition, total) [ml] | V(addition) [ml] | c(NMII) [mol/l] | c(8aa) [mol/l] | c(NMII)/c(8aa) | fluorescer | fluorescer |
|----|----------------|-------------------------|------------------|-----------------|----------------|----------------|------------|------------|
| 1  | 2.500000       | 0.000000                | 0.000000         | 0.000000        | 0.000131       | 0.000000       | 199.50     | 243.23     |
| 2  | 2.503000       | 0.003000                | 0.003000         | 0.000018        | 0.000131       | 0.134068       | 197.76     | 242.87     |
| 3  | 2.510000       | 0.010000                | 0.007000         | 0.000058        | 0.000131       | 0.445646       | 195.15     | 234.48     |
| 4  | 2.520000       | 0.020000                | 0.010000         | 0.000116        | 0.000131       | 0.887755       | 186.37     | 227.34     |
| 5  | 2.535000       | 0.035000                | 0.015000         | 0.000202        | 0.000131       | 1.544378       | 171.23     | 206.87     |
| 6  | 2.563000       | 0.063000                | 0.028000         | 0.000360        | 0.000131       | 2.749511       | 160.41     | 193.46     |
| 7  | 2.613000       | 0.113000                | 0.050000         | 0.000634        | 0.000131       | 4.837295       | 123.14     | 145.56     |
| 8  | 2.681000       | 0.181000                | 0.068000         | 0.000989        | 0.000131       | 7.551710       | 90.53      | 106.22     |
| 9  | 2.749000       | 0.249000                | 0.068000         | 0.001327        | 0.000131       | 10.131836      | 69.44      | 80.25      |
| 10 | 2.500000       | 0.300000                | 0.300000         | 0.001758        | 0.000131       | 13.422851      | 41.66      | 46.33      |
| 11 | 2.600000       | 0.400000                | 0.100000         | 0.002254        | 0.000131       | 17.208783      | 28.83      | 31.09      |
| 12 | 2.700000       | 0.500000                | 0.100000         | 0.002713        | 0.000131       | 20.714276      | 20.07      | 20.68      |
| 13 | 2.800000       | 0.600000                | 0.100000         | 0.003140        | 0.000131       | 23.969377      | 14.18      | 14.46      |
| 14 | 2.900000       | 0.700000                | 0.100000         | 0.003537        | 0.000131       | 26.999988      | 9.61       | 8.60       |
| 15 | 3.000000       | 0.800000                | 0.100000         | 0.003907        | 0.000131       | 29.828558      | 5.83       | 6.29       |

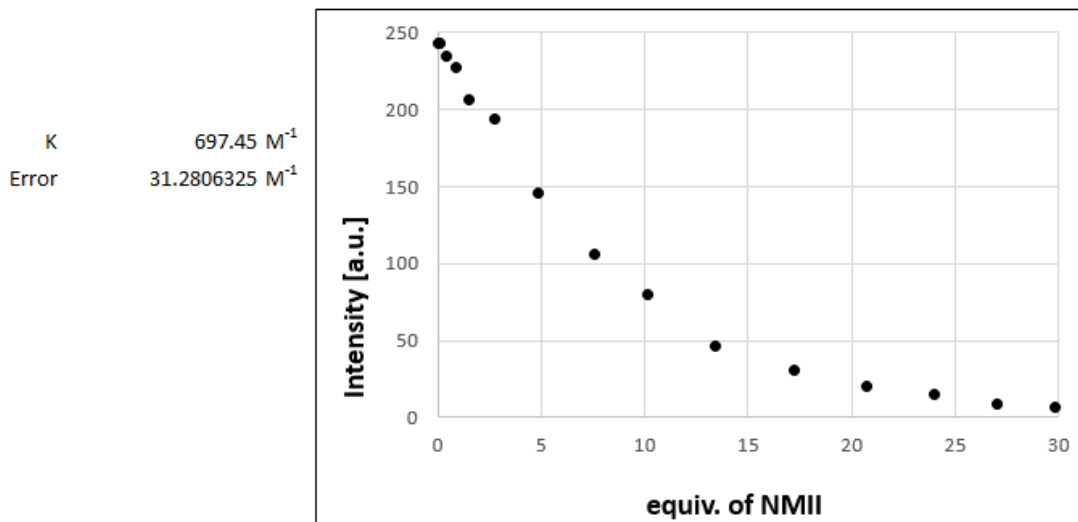

Figure 72: <sup>1</sup>H NMR titration of compound **8aa** with NMII (CH<sub>2</sub>Cl<sub>2</sub>).

Calixarene **8aa-1** was dissolved in specified amount of  $\text{CH}_2\text{Cl}_2$  (solution 1). 0.55 ml of calixarene solution 1 was put in a volumetric flask and diluted to total volume of 5 ml (solution 2). 2.5 ml of solution 2 was put to a fluorescence cuvette. Specified amount of (*S*)-1-Methyl-3-(1-methylpyrrolidin-2-yl)pyridinium iodide (NMNI) was put to another volumetric flask, 0.55 ml of solution 1 was added and the solution was diluted to total volume of 5 ml (solution 3). The aliquots of NMNI were gradually added to fluorescence tube to achieve different calixarene/guest ratios (1:0.000-28.323), ensuring constant host concentration during the experiment. The complexation constants were determined by analyzing fluorescence intensity using nonlinear curve-fitting procedure (program BindFit).

|    | V (total) [ml] | V(added, total) [ml] | V(added) [ml] | c(NMNI) [mol/l] | c(8aa-1) [mol/l] | c(NMNI)/c(8aa-1) | fluorescer | fluorescer | fluorescer |
|----|----------------|----------------------|---------------|-----------------|------------------|------------------|------------|------------|------------|
| 1  | 2.50000        | 0.00000              | 0.00000       | 0.00000         | 0.000115         | 0.000000         | 214.554    | 168.6094   | 11.92773   |
| 2  | 2.50300        | 0.00300              | 0.00300       | 0.000015        | 0.000115         | 0.127300         | 220.0388   | 172.3604   | 12.35316   |
| 3  | 2.51000        | 0.01000              | 0.00700       | 0.000049        | 0.000115         | 0.423149         | 216.0294   | 170.5441   | 12.06353   |
| 4  | 2.52000        | 0.02000              | 0.01000       | 0.000097        | 0.000115         | 0.842939         | 199.5746   | 160.2873   | 10.7974    |
| 5  | 2.53500        | 0.03500              | 0.01500       | 0.000169        | 0.000115         | 1.466415         | 194.2098   | 154.7734   | 10.0219    |
| 6  | 2.56300        | 0.06300              | 0.02800       | 0.000300        | 0.000115         | 2.610710         | 157.0061   | 124.2024   | 7.802997   |
| 7  | 2.61300        | 0.11300              | 0.05000       | 0.000528        | 0.000115         | 4.593098         | 122.8441   | 97.17803   | 5.562119   |
| 8  | 2.68100        | 0.18100              | 0.06800       | 0.000824        | 0.000115         | 7.170484         | 86.11126   | 69.17575   | 3.225509   |
| 9  | 2.74900        | 0.24900              | 0.06800       | 0.001106        | 0.000115         | 9.620359         | 62.52728   | 49.62094   | 1.671861   |
| 10 | 2.50000        | 0.30000              | 0.30000       | 0.001465        | 0.000115         | 12.745237        | 36.09595   | 29.07918   | 0.903414   |
| 11 | 2.60000        | 0.40000              | 0.10000       | 0.001878        | 0.000115         | 16.340048        | 25.90681   | 20.86432   | 0.522382   |
| 12 | 2.70000        | 0.50000              | 0.10000       | 0.002261        | 0.000115         | 19.668576        | 18.55095   | 15.5127    | 0.429352   |
| 13 | 2.80000        | 0.60000              | 0.10000       | 0.002616        | 0.000115         | 22.759352        | 14.23187   | 11.17925   | 0.187106   |
| 14 | 2.90000        | 0.70000              | 0.10000       | 0.002947        | 0.000115         | 25.636972        | 11.35532   | 9.01088    | 0.215326   |
| 15 | 3.00000        | 0.80000              | 0.10000       | 0.003256        | 0.000115         | 28.322750        | 9.48248    | 7.566717   | 0.05596    |

K            1023.09  $\text{M}^{-1}$   
 Error        58.1831283  $\text{M}^{-1}$

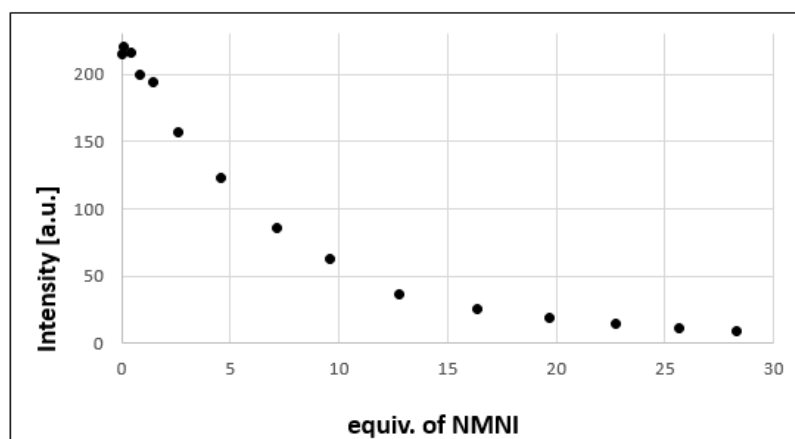

**Figure 73:**  $^1\text{H}$  NMR titration of compound **8aa-1** with NMNI ( $\text{CH}_2\text{Cl}_2$ ).

Calixarene **8aa-2** was dissolved in specified amount of  $\text{CH}_2\text{Cl}_2$  (solution 1). 0.8 ml of calixarene solution 1 was put in a volumetric flask and diluted to total volume of 5 ml (solution 2). 2.5 ml of solution 2 was put to a fluorescence cuvette. Specified amount of (*S*)-1-Methyl-3-(1-methylpyrrolidin-2-yl)pyridinium iodide (NMNI) was put to another volumetric flask, 0.8 ml of solution 1 was added and the solution was diluted to total volume of 5 ml (solution 3). The aliquots of NMNI were gradually added to fluorescence tube to achieve different calixarene/guest ratios (1:0.000-32.032), ensuring constant host concentration during the experiment. The complexation constants were determined by analyzing fluorescence intensity using nonlinear curve-fitting procedure (program BindFit).

|    | V (total) [ml] | V(added, total) [ml] | V(added) [ml] | c(NMNI) [mol/l] | c(8aa-2) [mol/l] | c(NMNI)/c(8aa-2) | fluorescence | fluorescence | fluorescence |
|----|----------------|----------------------|---------------|-----------------|------------------|------------------|--------------|--------------|--------------|
| 1  | 2.500000       | 0.000000             | 0.000000      | 0.000000        | 0.000115         | 0.000000         | 262.0602     | 202.5699     | 7.959859     |
| 2  | 2.503000       | 0.003000             | 0.003000      | 0.000017        | 0.000115         | 0.143970         | 262.1531     | 205.9744     | 7.704388     |
| 3  | 2.510000       | 0.010000             | 0.007000      | 0.000055        | 0.000115         | 0.478563         | 254.4821     | 199.7941     | 7.562208     |
| 4  | 2.520000       | 0.020000             | 0.010000      | 0.000110        | 0.000115         | 0.953328         | 246.8108     | 195.6015     | 6.998728     |
| 5  | 2.535000       | 0.035000             | 0.015000      | 0.000191        | 0.000115         | 1.658451         | 226.1117     | 177.2112     | 6.483453     |
| 6  | 2.563000       | 0.063000             | 0.028000      | 0.000340        | 0.000115         | 2.952600         | 180.8214     | 142.5319     | 4.997797     |
| 7  | 2.613000       | 0.113000             | 0.050000      | 0.000599        | 0.000115         | 5.194595         | 131.2368     | 105.4533     | 3.291471     |
| 8  | 2.681000       | 0.181000             | 0.068000      | 0.000934        | 0.000115         | 8.109507         | 93.04965     | 72.8703      | 2.186102     |
| 9  | 2.749000       | 0.249000             | 0.068000      | 0.001254        | 0.000115         | 10.880210        | 67.74667     | 54.28183     | 0.969769     |
| 10 | 2.500000       | 0.300000             | 0.300000      | 0.001661        | 0.000115         | 14.414313        | 41.72074     | 33.80562     | 0.665596     |
| 11 | 2.600000       | 0.400000             | 0.100000      | 0.002129        | 0.000115         | 18.479888        | 29.27642     | 24.25861     | 0.448374     |
| 12 | 2.700000       | 0.500000             | 0.100000      | 0.002563        | 0.000115         | 22.244309        | 23.11673     | 18.18512     | 0.182004     |
| 13 | 2.800000       | 0.600000             | 0.100000      | 0.002966        | 0.000115         | 25.739844        | 17.3428      | 14.39961     | 0.156406     |
| 14 | 2.900000       | 0.700000             | 0.100000      | 0.003341        | 0.000115         | 28.994307        | 13.2909      | 10.82477     | 0.218079     |
| 15 | 3.000000       | 0.800000             | 0.100000      | 0.003691        | 0.000115         | 32.031806        | 12.00225     | 9.671965     | 0.041457     |

K                    1145.54  $\text{M}^{-1}$   
 Error                63.41938548  $\text{M}^{-1}$

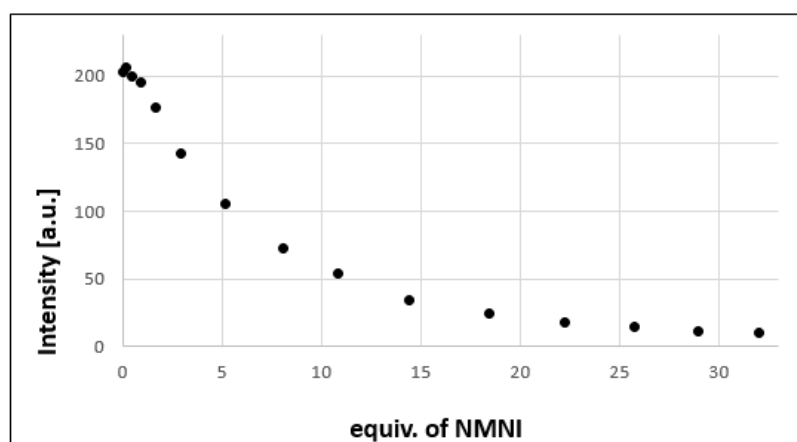

Figure 74:  $^1\text{H}$  NMR titration of compound **8aa-2** with NMNI ( $\text{CH}_2\text{Cl}_2$ ).

Calixarene **8bb** was dissolved in specified amount of CH<sub>2</sub>Cl<sub>2</sub> (solution 1). 0.25 ml of calixarene solution 1 was put in a volumetric flask and diluted to total volume of 5 ml (solution 2). 2.5 ml of solution 2 was put to a fluorescence cuvette. Specified amount of *N*-methylisoquinolinium iodide (NMII) was put to another volumetric flask, 0.25 ml of solution 1 was added and the solution was diluted to total volume of 5 ml (solution 3). The aliquots of NMII were gradually added to fluorescence tube to achieve different calixarene/guest ratios (1:0.000–47.816), ensuring constant host concentration during the experiment. The complexation constants were determined by analyzing fluorescence intensity using nonlinear curve-fitting procedure (program BindFit).

|                                          |                   |                                         |                |         |
|------------------------------------------|-------------------|-----------------------------------------|----------------|---------|
| M(NMII)                                  | 271.10147 g/mol   | M( <b>8bb</b> )                         | 1045.336 g/mol |         |
| m(NMII)                                  | 0.0236 g          | m( <b>8bb</b> )                         | 0.00051 g      | 0.00203 |
| c(NMII)                                  | 0.017410455 mol/l | c( <b>8bb</b> )                         | 0.000097 mol/l |         |
| V(CH <sub>2</sub> Cl <sub>2</sub> _NMII) | 5 ml              | V(CH <sub>2</sub> Cl <sub>2</sub> _8bb) | 5 ml           |         |

  

|    | V (total) [ml] | V(added, total) [ml] | V(added) [ml] | c(NMII) [mol/l] | c( <b>8bb</b> ) [mol/l] | c(NMII)/c( <b>8bb</b> ) | fluorescence | fluorescence | fluorescence | fluorescence |
|----|----------------|----------------------|---------------|-----------------|-------------------------|-------------------------|--------------|--------------|--------------|--------------|
| 1  | 2.500000       | 0.000000             | 0.000000      | 0.000000        | 0.000097                | 0.000000                | 912.8894     | 554.7544     | 707.7678     | 231.7736     |
| 2  | 2.503000       | 0.003000             | 0.003000      | 0.000021        | 0.000097                | 0.214912                | 918.936      | 550.1825     | 706.7305     | 219.8474     |
| 3  | 2.510000       | 0.010000             | 0.007000      | 0.000069        | 0.000097                | 0.714375                | 854.0452     | 503.3274     | 675.0663     | 193.0115     |
| 4  | 2.520000       | 0.020000             | 0.010000      | 0.000138        | 0.000097                | 1.423080                | 756.7221     | 435.3731     | 600.1621     | 158.2693     |
| 5  | 2.535000       | 0.035000             | 0.015000      | 0.000240        | 0.000097                | 2.475655                | 636.897      | 352.2045     | 493.3597     | 113.8643     |
| 6  | 2.563000       | 0.063000             | 0.028000      | 0.000428        | 0.000097                | 4.407496                | 416.2254     | 212.9528     | 318.4914     | 64.62449     |
| 7  | 2.613000       | 0.113000             | 0.050000      | 0.000753        | 0.000097                | 7.754236                | 267.4121     | 131.3659     | 194.7122     | 36.99195     |
| 8  | 2.681000       | 0.181000             | 0.068000      | 0.001175        | 0.000097                | 12.105473               | 167.2709     | 77.98933     | 116.62       | 18.89854     |
| 9  | 2.749000       | 0.249000             | 0.068000      | 0.001577        | 0.000097                | 16.241442               | 101.6831     | 48.08674     | 66.85209     | 9.97151      |
| 10 | 2.500000       | 0.300000             | 0.300000      | 0.002089        | 0.000097                | 21.516976               | 51.65318     | 25.47579     | 30.22287     | 6.16394      |
| 11 | 2.600000       | 0.400000             | 0.100000      | 0.002679        | 0.000097                | 27.585867               | 43.51534     | 20.50124     | 23.91788     | 4.603973     |
| 12 | 2.700000       | 0.500000             | 0.100000      | 0.003224        | 0.000097                | 33.205210               | 29.09026     | 14.19861     | 12.89789     | 3.268435     |
| 13 | 2.800000       | 0.600000             | 0.100000      | 0.003731        | 0.000097                | 38.423172               | 19.23077     | 9.838295     | 8.578782     | 2.40634      |
| 14 | 2.900000       | 0.700000             | 0.100000      | 0.004203        | 0.000097                | 43.281274               | 13.95126     | 7.491844     | 5.394998     | 1.796158     |
| 15 | 3.000000       | 0.800000             | 0.100000      | 0.004643        | 0.000097                | 47.815502               | 12.45473     | 6.806807     | 4.390254     | 1.555014     |

K            2345.01 M<sup>-1</sup>  
 Error        160.1946681 M<sup>-1</sup>

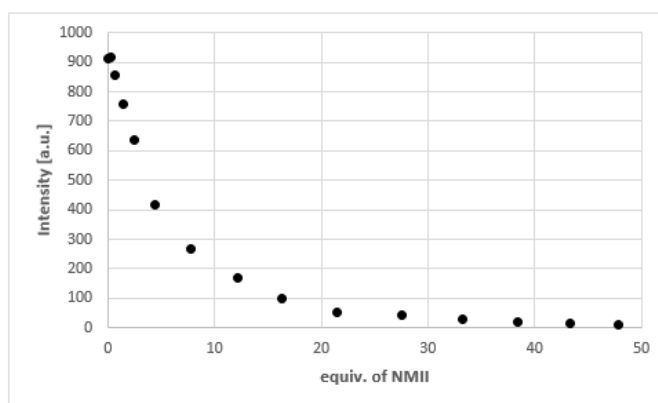

**Figure 75:** <sup>1</sup>H NMR titration of compound **8bb** with NMII (CH<sub>2</sub>Cl<sub>2</sub>).



Calixarene **8bb** was dissolved in specified amount of  $\text{CH}_2\text{Cl}_2$  (solution 1). 0.20 ml of calixarene solution 1 was put in a volumetric flask and diluted to total volume of 5 ml (solution 2). 2.5 ml of solution 2 was put to a fluorescence cuvette. Specified amount of *N*-methylquinolinium iodide (NMQI) was put to another volumetric flask, 0.20 ml of solution 1 was added and the solution was diluted to total volume of 5 ml (solution 3). The aliquots of NMQI were gradually added to fluorescence tube to achieve different calixarene/guest ratios (1:0.000-48.930), ensuring constant host concentration during the experiment. The complexation constants were determined by analyzing fluorescence intensity using nonlinear curve-fitting procedure (program BindFit).

|                                    |                   |                                   |                |         |
|------------------------------------|-------------------|-----------------------------------|----------------|---------|
| M(NMQI)                            | 271.10147 g/mol   | M( <b>8bb</b> )                   | 1045.336 g/mol |         |
| m(NMQI)                            | 0.01932 g         | m( <b>8bb</b> )                   | 0.00041 g      | 0.00203 |
| c(NMQI)                            | 0.014252966 mol/l | c( <b>8bb</b> )                   | 0.000078 mol/l |         |
| V( $\text{CH}_2\text{Cl}_2$ _NMQI) | 5 ml              | V( $\text{CH}_2\text{Cl}_2$ _8bb) | 5 ml           |         |

|    | V (total) [ml] | V(added, total) [ml] | V(added) [ml] | c(NMQI) [mol/l] | c( <b>8bb</b> ) [mol/l] | c(NMQI)/c( <b>8bb</b> ) | fluorescence | fluorescence | fluorescence |
|----|----------------|----------------------|---------------|-----------------|-------------------------|-------------------------|--------------|--------------|--------------|
| 1  | 2.500000       | 0.000000             | 0.000000      | 0.000000        | 0.000078                | 0.000000                | 365.1827     | 485.1543     | 607.8722     |
| 2  | 2.503000       | 0.003000             | 0.003000      | 0.000017        | 0.000078                | 0.219920                | 342.6986     | 469.8418     | 609.3022     |
| 3  | 2.510000       | 0.010000             | 0.007000      | 0.000057        | 0.000078                | 0.731024                | 302.6639     | 445.1225     | 568.4015     |
| 4  | 2.520000       | 0.020000             | 0.010000      | 0.000113        | 0.000078                | 1.456245                | 274.4518     | 431.9343     | 558.2444     |
| 5  | 2.535000       | 0.035000             | 0.015000      | 0.000197        | 0.000078                | 2.533350                | 214.0205     | 368.4146     | 479.0066     |
| 6  | 2.563000       | 0.063000             | 0.028000      | 0.000350        | 0.000078                | 4.510213                | 155.8725     | 304.4912     | 396.8813     |
| 7  | 2.613000       | 0.113000             | 0.050000      | 0.000616        | 0.000078                | 7.934949                | 102.4513     | 235.2298     | 297.187      |
| 8  | 2.681000       | 0.181000             | 0.068000      | 0.000962        | 0.000078                | 12.387592               | 66.37468     | 160.5352     | 195.5901     |
| 9  | 2.749000       | 0.249000             | 0.068000      | 0.001291        | 0.000078                | 16.619951               | 40.62778     | 96.61857     | 103.943      |
| 10 | 2.500000       | 0.300000             | 0.300000      | 0.001710        | 0.000078                | 22.018431               | 23.0515      | 55.73735     | 57.59327     |
| 11 | 2.600000       | 0.400000             | 0.100000      | 0.002193        | 0.000078                | 28.228758               | 12.44105     | 29.93987     | 24.47273     |
| 12 | 2.700000       | 0.500000             | 0.100000      | 0.002639        | 0.000078                | 33.979060               | 8.291224     | 19.32528     | 14.38439     |
| 13 | 2.800000       | 0.600000             | 0.100000      | 0.003054        | 0.000078                | 39.318627               | 6.288636     | 13.7365      | 9.15774      |
| 14 | 2.900000       | 0.700000             | 0.100000      | 0.003440        | 0.000078                | 44.289947               | 4.905201     | 9.962555     | 5.378346     |
| 15 | 3.000000       | 0.800000             | 0.100000      | 0.003801        | 0.000078                | 48.929847               | 3.255194     | 7.288543     | 3.323562     |

K                    1567.44  $\text{M}^{-1}$   
 Error                118.4827896  $\text{M}^{-1}$

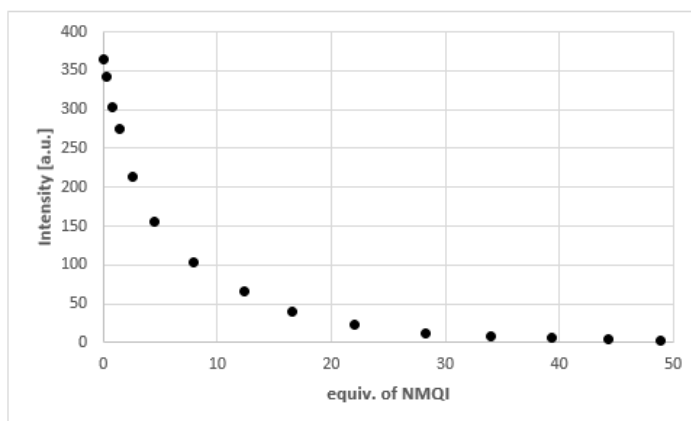

**Figure 76:**  $^1\text{H}$  NMR titration of compound **8bb** with NMQI ( $\text{CH}_2\text{Cl}_2$ ).



## 6. Theoretical calculations

### Internal coordinates

#### 8bb conformer A

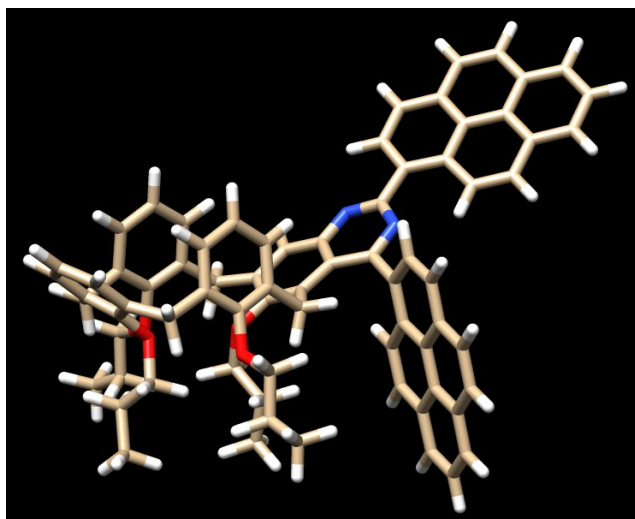

scf done -3268.09338322

|   |          |          |          |
|---|----------|----------|----------|
| C | 0        | 0        | 0        |
| C | 0        | 1.403668 | 0        |
| C | 1.200752 | 2.121073 | 0        |
| C | 2.419094 | 1.437399 | -0.06894 |
| C | 2.461508 | 0.033934 | -0.07678 |
| C | 1.241481 | -0.66436 | 0.037414 |
| C | -1.28651 | -0.79703 | -0.16499 |
| O | 1.236261 | -2.06361 | 0.078106 |
| C | -1.21746 | -1.1186  | -3.98339 |
| C | -1.2422  | -0.57879 | -2.6963  |
| C | -1.37968 | -1.40128 | -1.56759 |
| C | -1.51994 | -2.78671 | -1.77237 |
| C | -1.42431 | -3.35865 | -3.05579 |
| C | -1.28102 | -2.50252 | -4.15687 |
| C | 0.742526 | -5.80234 | -0.92009 |
| O | -1.74469 | -3.63894 | -0.66136 |
| C | -1.41594 | -4.87397 | -3.25926 |
| C | -0.159   | -5.72764 | -5.27402 |
| C | -0.14161 | -5.34468 | -3.94849 |
| C | 1.126402 | -5.25287 | -3.28932 |
| C | 2.343283 | -5.43036 | -3.95006 |
| C | 2.311971 | -5.92181 | -5.30036 |
| C | 1.039646 | -6.01826 | -5.97147 |

|   |          |          |          |
|---|----------|----------|----------|
| O | 1.157609 | -4.83482 | -1.96006 |
| C | 3.616513 | -3.41555 | -3.11732 |
| C | 3.829311 | -2.77918 | -1.87905 |
| C | 3.718877 | -1.38352 | -1.73468 |
| C | 3.483242 | -0.61451 | -2.88419 |
| C | 3.340934 | -1.21851 | -4.13436 |
| C | 3.384611 | -2.61035 | -4.24226 |
| C | 3.763698 | -0.70821 | -0.36332 |
| O | 4.139157 | -3.56428 | -0.73921 |
| C | 1.517259 | -7.51392 | 0.782972 |
| C | 1.699153 | -2.70872 | 1.321975 |
| C | 0.545175 | -2.95565 | 2.292973 |
| C | 1.007772 | -3.71471 | 3.548539 |
| C | -3.16235 | -3.79119 | -0.28696 |
| C | -3.24045 | -4.77845 | 0.86996  |
| C | 5.577305 | -3.83237 | -0.555   |
| C | 7.218719 | -4.97543 | 1.008973 |
| C | 1.933936 | -6.58395 | -0.36972 |
| C | -4.68688 | -5.01102 | 1.337143 |
| C | 5.744491 | -4.64636 | 0.721192 |
| C | 3.603884 | -4.93973 | -3.24009 |
| C | 3.423278 | -6.39205 | -6.08905 |
| N | 0.935097 | -6.3364  | -7.29758 |
| C | 2.052743 | -6.57063 | -7.99445 |
| N | 3.282779 | -6.656   | -7.39213 |
| C | 1.921319 | -6.74473 | -9.46383 |
| C | 2.901652 | -7.32879 | -10.3265 |
| C | 2.621706 | -7.40722 | -11.739  |
| C | 1.389496 | -6.90611 | -12.2682 |
| C | 0.449261 | -6.3515  | -11.3824 |
| C | 0.711578 | -6.28148 | -10.0238 |
| C | 4.154811 | -7.88241 | -9.86998 |
| C | 5.051339 | -8.44542 | -10.7327 |
| C | 4.805314 | -8.51925 | -12.144  |
| C | 3.572123 | -7.99209 | -12.6396 |
| C | 3.297506 | -8.0593  | -14.0453 |
| C | 2.052021 | -7.53339 | -14.5344 |
| C | 1.139791 | -6.98344 | -13.6817 |
| C | 5.726484 | -9.09089 | -13.0425 |
| C | 5.449838 | -9.14792 | -14.4099 |
| C | 4.248504 | -8.63798 | -14.9074 |
| C | 4.794915 | -6.68566 | -5.57028 |
| C | 5.877607 | -6.00415 | -6.15076 |
| C | 7.186445 | -6.23007 | -5.73421 |
| C | 7.469332 | -7.17354 | -4.73037 |
| C | 6.388388 | -7.91666 | -4.15608 |

|   |          |          |          |
|---|----------|----------|----------|
| C | 5.0394   | -7.67913 | -4.5842  |
| C | 6.664064 | -8.90166 | -3.15415 |
| C | 5.598224 | -9.6683  | -2.58557 |
| C | 4.260427 | -9.42969 | -3.05528 |
| C | 3.993253 | -8.48505 | -4.00502 |
| C | 8.810232 | -7.42208 | -4.27052 |
| C | 9.068812 | -8.35316 | -3.3067  |
| C | 8.009267 | -9.12783 | -2.71563 |
| C | 8.253628 | -10.0986 | -1.72596 |
| C | 7.205114 | -10.8405 | -1.17646 |
| C | 5.891135 | -10.631  | -1.60112 |
| H | -0.94889 | 1.933184 | -0.00621 |
| H | 1.186288 | 3.206323 | 0.014707 |
| H | 3.349619 | 1.9942   | -0.13984 |
| H | -1.33372 | -1.60638 | 0.564845 |
| H | -2.1399  | -0.13011 | 0.016176 |
| H | -1.11441 | -0.46667 | -4.84498 |
| H | -1.12348 | 0.491147 | -2.55674 |
| H | -1.20078 | -2.92848 | -5.15238 |
| H | 0.265899 | -5.18497 | -0.15843 |
| H | -0.00659 | -6.48973 | -1.33389 |
| H | -1.54412 | -5.35319 | -2.28782 |
| H | -2.26747 | -5.17115 | -3.88417 |
| H | -1.0835  | -5.7784  | -5.83821 |
| H | 3.386443 | 0.462553 | -2.78705 |
| H | 3.165218 | -0.61044 | -5.01613 |
| H | 3.217782 | -3.08182 | -5.20575 |
| H | 3.974204 | -1.46747 | 0.392053 |
| H | 4.586486 | 0.017605 | -0.33023 |
| H | 2.379028 | -8.06888 | 1.16953  |
| H | 1.084653 | -6.94615 | 1.616564 |
| H | 0.768802 | -8.2474  | 0.456392 |
| H | 2.161486 | -3.63857 | 0.989686 |
| H | 2.468862 | -2.08725 | 1.796581 |
| H | -0.23566 | -3.51793 | 1.767955 |
| H | 0.105641 | -1.99193 | 2.584256 |
| H | 1.77934  | -3.15529 | 4.09261  |
| H | 1.428469 | -4.69457 | 3.288785 |
| H | 0.172392 | -3.88264 | 4.237233 |
| H | -3.56824 | -2.81103 | -0.00131 |
| H | -3.72828 | -4.15275 | -1.157   |
| H | -2.78708 | -5.72684 | 0.554939 |
| H | -2.6318  | -4.39776 | 1.699642 |
| H | 6.115572 | -2.87637 | -0.49035 |
| H | 5.958462 | -4.37996 | -1.42767 |
| H | 7.31498  | -5.56106 | 1.929481 |

|   |          |          |          |
|---|----------|----------|----------|
| H | 7.662475 | -5.56034 | 0.194166 |
| H | 7.815459 | -4.06282 | 1.130612 |
| H | 2.691817 | -5.86798 | -0.03284 |
| H | 2.388669 | -7.17583 | -1.17566 |
| H | -5.14966 | -4.07833 | 1.682527 |
| H | -5.30852 | -5.41304 | 0.527564 |
| H | -4.71884 | -5.7251  | 2.16691  |
| H | 5.16354  | -5.57232 | 0.626915 |
| H | 5.310307 | -4.08372 | 1.557468 |
| H | 3.655623 | -5.36443 | -2.23768 |
| H | 4.492618 | -5.26171 | -3.78067 |
| H | -0.49014 | -5.97221 | -11.7739 |
| H | -0.02142 | -5.85985 | -9.34857 |
| H | 4.376737 | -7.82092 | -8.81584 |
| H | 5.983415 | -8.85335 | -10.3511 |
| H | 1.851479 | -7.58662 | -15.6007 |
| H | 0.198641 | -6.59166 | -14.0567 |
| H | 6.660314 | -9.48979 | -12.6569 |
| H | 6.170755 | -9.59142 | -15.0894 |
| H | 4.035123 | -8.68479 | -15.9714 |
| H | 5.674787 | -5.28117 | -6.93262 |
| H | 8.002167 | -5.67421 | -6.18647 |
| H | 3.45486  | -10.0306 | -2.64318 |
| H | 2.975707 | -8.34085 | -4.34602 |
| H | 9.618718 | -6.84821 | -4.71391 |
| H | 10.08613 | -8.53062 | -2.97017 |
| H | 9.273522 | -10.2683 | -1.39337 |
| H | 7.413588 | -11.5865 | -0.41638 |
| H | 5.08033  | -11.2139 | -1.17418 |

### 8bb conformer B

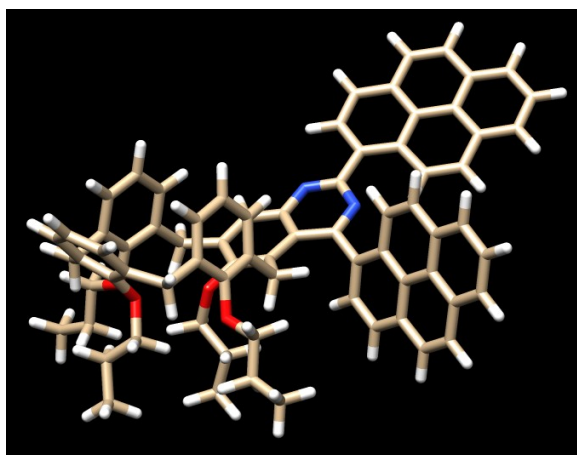

scf done: -3268.09332681

|   |          |          |          |
|---|----------|----------|----------|
| C | 0        | 0        | 0        |
| C | 0        | 1.403645 | 0        |
| C | 1.200875 | 2.121208 | 0        |
| C | 2.418987 | 1.437308 | -0.0719  |
| C | 2.460787 | 0.033826 | -0.08001 |
| C | 1.241342 | -0.66388 | 0.039299 |
| C | -1.28434 | -0.79848 | -0.17323 |
| O | 1.235707 | -2.06273 | 0.087806 |
| C | -1.17849 | -1.10392 | -3.99246 |
| C | -1.2177  | -0.569   | -2.70379 |
| C | -1.36581 | -1.39624 | -1.57983 |
| C | -1.50207 | -2.78099 | -1.79149 |
| C | -1.39194 | -3.34804 | -3.07605 |
| C | -1.23795 | -2.48727 | -4.17199 |
| C | 0.783889 | -5.74401 | -0.92807 |
| O | -1.73107 | -3.63697 | -0.68418 |
| C | -1.38475 | -4.86185 | -3.28703 |
| C | -0.12633 | -5.73877 | -5.29113 |
| C | -0.10914 | -5.33968 | -3.96961 |
| C | 1.157578 | -5.24345 | -3.30852 |
| C | 2.373892 | -5.44376 | -3.96367 |
| C | 2.338457 | -5.97138 | -5.29907 |
| C | 1.071531 | -6.05471 | -5.97905 |
| O | 1.190283 | -4.79586 | -1.98852 |
| C | 3.620931 | -3.40581 | -3.14508 |
| C | 3.835581 | -2.7726  | -1.90588 |
| C | 3.702842 | -1.37977 | -1.752   |
| C | 3.438094 | -0.60936 | -2.89417 |
| C | 3.290867 | -1.20928 | -4.14577 |
| C | 3.36052  | -2.59901 | -4.2627  |
| C | 3.759066 | -0.70976 | -0.37812 |

|   |          |          |          |
|---|----------|----------|----------|
| O | 4.1719   | -3.55971 | -0.77411 |
| C | 1.567962 | -7.44788 | 0.779105 |
| C | 1.722557 | -2.70028 | 1.326395 |
| C | 0.574619 | -2.99503 | 2.29161  |
| C | 1.058181 | -3.75503 | 3.538445 |
| C | -3.15055 | -3.80924 | -0.32725 |
| C | -3.22791 | -4.79648 | 0.82988  |
| C | 5.618947 | -3.77098 | -0.58655 |
| C | 7.300052 | -4.8565  | 0.976292 |
| C | 1.976134 | -6.53094 | -0.38683 |
| C | -4.67646 | -5.05044 | 1.278859 |
| C | 5.814321 | -4.59069 | 0.682006 |
| C | 3.64257  | -4.92846 | -3.28313 |
| C | 3.444066 | -6.5028  | -6.05584 |
| N | 0.976115 | -6.39108 | -7.30137 |
| C | 2.097749 | -6.66258 | -7.97962 |
| N | 3.313529 | -6.7861  | -7.35628 |
| C | 1.981448 | -6.85096 | -9.44897 |
| C | 2.959257 | -7.46577 | -10.2933 |
| C | 2.692274 | -7.55877 | -11.7076 |
| C | 1.47514  | -7.0428  | -12.2569 |
| C | 0.537573 | -6.45626 | -11.3889 |
| C | 0.787604 | -6.3712  | -10.0289 |
| C | 4.197476 | -8.03577 | -9.81666 |
| C | 5.09334  | -8.6249  | -10.6625 |
| C | 4.860057 | -8.71419 | -12.0748 |
| C | 3.640915 | -8.17364 | -12.5902 |
| C | 3.378227 | -8.25797 | -13.9973 |
| C | 2.146948 | -7.71809 | -14.5064 |
| C | 1.237112 | -7.13804 | -13.6712 |
| C | 5.779993 | -9.31455 | -12.9558 |
| C | 5.514999 | -9.3882  | -14.3246 |
| C | 4.327066 | -8.86613 | -14.8413 |
| C | 4.72927  | -6.94521 | -5.43909 |
| C | 4.658569 | -7.84698 | -4.36095 |
| C | 5.803465 | -8.38097 | -3.77941 |
| C | 7.080477 | -8.02499 | -4.24902 |
| C | 7.183336 | -7.10552 | -5.34192 |
| C | 5.999855 | -6.5676  | -5.95229 |
| C | 8.477903 | -6.72997 | -5.8251  |
| C | 8.59983  | -5.80788 | -6.91185 |
| C | 7.397955 | -5.27468 | -7.493   |
| C | 6.161655 | -5.63322 | -7.0385  |
| C | 8.283282 | -8.55586 | -3.66452 |
| C | 9.515526 | -8.19793 | -4.12968 |
| C | 9.659074 | -7.27361 | -5.22332 |

|   |          |          |          |
|---|----------|----------|----------|
| C | 10.91994 | -6.89037 | -5.71831 |
| C | 11.02746 | -5.99046 | -6.78135 |
| C | 9.881798 | -5.45332 | -7.37292 |
| H | -0.94905 | 1.932873 | -0.00701 |
| H | 1.186513 | 3.206425 | 0.015184 |
| H | 3.349541 | 1.99368  | -0.14626 |
| H | -1.33343 | -1.61225 | 0.551713 |
| H | -2.14012 | -0.1343  | 0.006214 |
| H | -1.06736 | -0.44855 | -4.85045 |
| H | -1.1017  | 0.5005   | -2.55902 |
| H | -1.14569 | -2.90943 | -5.16809 |
| H | 0.326846 | -5.11019 | -0.16834 |
| H | 0.020065 | -6.42905 | -1.31802 |
| H | -1.52189 | -5.34626 | -2.31916 |
| H | -2.23324 | -5.15332 | -3.91875 |
| H | -1.05001 | -5.78647 | -5.85696 |
| H | 3.322682 | 0.465198 | -2.79048 |
| H | 3.093219 | -0.59962 | -5.02175 |
| H | 3.194334 | -3.06818 | -5.22756 |
| H | 3.973474 | -1.47285 | 0.372342 |
| H | 4.583859 | 0.013921 | -0.34798 |
| H | 2.429609 | -8.00778 | 1.158915 |
| H | 1.152393 | -6.869   | 1.613662 |
| H | 0.808358 | -8.17686 | 0.469154 |
| H | 2.22024  | -3.61077 | 0.989895 |
| H | 2.466845 | -2.0533  | 1.807717 |
| H | -0.18814 | -3.57398 | 1.758154 |
| H | 0.104854 | -2.04877 | 2.592562 |
| H | 1.810758 | -3.17878 | 4.091486 |
| H | 1.510265 | -4.71754 | 3.266622 |
| H | 0.227294 | -3.95831 | 4.222941 |
| H | -3.57456 | -2.83497 | -0.04753 |
| H | -3.70089 | -4.18031 | -1.20324 |
| H | -2.75619 | -5.7381  | 0.52138  |
| H | -2.63521 | -4.40597 | 1.666547 |
| H | 6.118    | -2.79499 | -0.50972 |
| H | 6.025132 | -4.29303 | -1.46366 |
| H | 7.417136 | -5.44945 | 1.889715 |
| H | 7.776299 | -5.40828 | 0.156595 |
| H | 7.853349 | -3.91937 | 1.114267 |
| H | 2.746064 | -5.81922 | -0.06924 |
| H | 2.410958 | -7.134   | -1.19585 |
| H | -5.15797 | -4.12412 | 1.615688 |
| H | -5.28101 | -5.46376 | 0.462094 |
| H | -4.70827 | -5.76301 | 2.109892 |
| H | 5.274935 | -5.54022 | 0.57474  |

|   |          |          |          |
|---|----------|----------|----------|
| H | 5.350632 | -4.05677 | 1.521245 |
| H | 3.745561 | -5.36454 | -2.2888  |
| H | 4.52013  | -5.22072 | -3.85995 |
| H | -0.3904  | -6.06464 | -11.7953 |
| H | 0.055783 | -5.92609 | -9.36757 |
| H | 4.408432 | -7.96811 | -8.76086 |
| H | 6.014717 | -9.04219 | -10.2656 |
| H | 1.955282 | -7.78503 | -15.5736 |
| H | 0.306745 | -6.73524 | -14.0611 |
| H | 6.703368 | -9.72294 | -12.5552 |
| H | 6.234546 | -9.85425 | -14.9904 |
| H | 4.122629 | -8.92612 | -15.9064 |
| H | 3.682445 | -8.13851 | -3.98823 |
| H | 5.716322 | -9.08643 | -2.95846 |
| H | 7.491954 | -4.57183 | -8.31552 |
| H | 5.275278 | -5.23091 | -7.5095  |
| H | 8.186763 | -9.25515 | -2.83906 |
| H | 10.41528 | -8.60762 | -3.67983 |
| H | 11.81447 | -7.30496 | -5.26269 |
| H | 12.00798 | -5.70675 | -7.15002 |
| H | 9.970913 | -4.75388 | -8.1989  |
